# Supplementary material for: Mixed-methods implementation study of a virtual culturally tailored diabetes self-management programme for African and Caribbean communities (HEAL-D) in south London and its scaling up across NHS regions in England: study protocol
Source: PubMed Central journal article supplement — BMJ Open. 2022 Nov 8;12(11):e067161. doi: 10.1136/bmjopen-2022-067161 (PMC9644082; doi:10.1136/bmjopen-2022-067161), 2022-11-08
Supplement: bmjopen-2022-067161.draft_revisions.pdf [file bmjopen-2022-067161.draft_revisions.pdf]

# BMJ Open

BMJ Open is committed to open peer review. As part of this commitment we make the peer review history of every article we publish publicly available.

When an article is published we post the peer reviewers' comments and the authors' responses online. We also post the versions of the paper that were used during peer review. These are the versions that the peer review comments apply to.

The versions of the paper that follow are the versions that were submitted during the peer review process. They are not the versions of record or the final published versions. They should not be cited or distributed as the published version of this manuscript.

BMJ Open is an open access journal and the full, final, typeset and author-corrected version of record of the manuscript is available on our site with no access controls, subscription charges or pay-per-view fees (<http://bmjopen.bmj.com>).

If you have any questions on BMJ Open's open peer review process please email [info.bmjopen@bmj.com](mailto:info.bmjopen@bmj.com)

# BMJ Open

**A mixed methods implementation study of a virtual culturally tailored diabetes self-management programme for African and Caribbean communities (HEAL-D) in south London and its scaling up across NHS regions in England: study protocol**

|                               |                                                                                                                                                                                                                                                                                                                                                                                        |
|-------------------------------|----------------------------------------------------------------------------------------------------------------------------------------------------------------------------------------------------------------------------------------------------------------------------------------------------------------------------------------------------------------------------------------|
| Journal:                      | <i>BMJ Open</i>                                                                                                                                                                                                                                                                                                                                                                        |
| Manuscript ID                 | bmjopen-2022-067161                                                                                                                                                                                                                                                                                                                                                                    |
| Article Type:                 | Protocol                                                                                                                                                                                                                                                                                                                                                                               |
| Date Submitted by the Author: | 05-Aug-2022                                                                                                                                                                                                                                                                                                                                                                            |
| Complete List of Authors:     | Lowry, Sophie; Health Innovation Network<br>Goff, Louise; Kings College London, Diabetes and Nutritional Sciences<br>Irwin, Sally; Health Innovation Network<br>Brady, Oliver; Health Innovation Network<br>Curran, Natasha; Health Innovation Network<br>Lelliott, Zoe; NIHR ARC South London,<br>Sevdalis, Nick; King's College London,<br>Walker, Andrew; Health Innovation Network |
| Keywords:                     | DIABETES & ENDOCRINOLOGY, EDUCATION & TRAINING (see Medical Education & Training), QUALITATIVE RESEARCH                                                                                                                                                                                                                                                                                |
|                               |                                                                                                                                                                                                                                                                                                                                                                                        |

SCHOLARONE™  
Manuscripts

1  
2  
3  
4 1 **A mixed methods implementation study of a**  
5  
6 2 **virtual culturally tailored diabetes self-**  
7  
8 3 **management programme for African and**  
9  
10 4 **Caribbean communities (HEAL-D) in south**  
11  
12 5 **London and its scaling up across NHS regions**  
13  
14 6 **in England: study protocol**  
15  
16  
17  
18  
19

20 8 **Authors**

21 9 Sophie Lowry<sup>1</sup> (0000-0003-1707-9133), Louise Goff<sup>2</sup> (0000-0001-9633-8759), Sally Irwin<sup>1</sup>  
22 10 (0000-0003-4125-2258), Oliver Brady<sup>1</sup> (0000-0002-9097-0486), Natasha Curran<sup>1</sup> (0000-  
23 11 0003-0165-7314), Zoe Lelliott<sup>1</sup> (0000-0002-6596-3057T), Nick Sevdalis<sup>3</sup> (0000-0001-7560-  
24 12 8924), Andrew Walker<sup>1</sup> (0000-0003-1128-8954)  
25  
26  
27  
28

29 14 **Affiliations:**

30  
31  
32 15 <sup>1</sup>Health Innovation Network, London, UK;

33  
34 16 <sup>2</sup>Department of Nutritional Sciences, King's College London, Faculty of Life Sciences and  
35 17 Medicine, London, UK

36  
37  
38 18 <sup>3</sup>Centre for Implementation Science, Institute of Psychiatry, Psychology and Neuroscience,  
39 19 King's College London, London, UK;

40  
41  
42  
43  
44 20 **Corresponding author**

45  
46  
47 21 Full name: Sophie Lowry

48  
49  
50 22 Postal address: Health Innovation Network, Ground Floor, Minerva House, 5 Montague  
51 23 Close, London SE1 9BB

52  
53  
54 24 Email: [sophie.lowry2@nhs.net](mailto:sophie.lowry2@nhs.net)

55  
56  
57 25 Word count: 3148  
58  
59  
60

## 26 KEY WORDS

- 27 1. Diabetes
- 28 2. Education
- 29 3. Self-management
- 30 4. Implementation
- 31 5. Implementation Science
- 32 6. HEAL-D
- 33 7. Virtual
- 34 8. Scale-up

## 36 ABSTRACT

### 37 Introduction

38 The NHS Insight Prioritisation Programme (NIPP) was established to accelerate the  
39 implementation and evaluation of innovation that supports post-pandemic ways of working.  
40 Supporting this, the Academic Health Science Network (AHSN) and NIHR Applied Research  
41 Collaboration (ARC) South London are testing and evaluating the implementation and scale-  
42 up of a Type 2 diabetes (T2D) intervention.

43 T2D is estimated to be three times more prevalent in UK African and Caribbean communities  
44 than in white Europeans. To tackle ethnic inequalities in T2D healthcare access, an  
45 evidence-based, culturally tailored self-management and education programme for African  
46 and Caribbean adults (Healthy Eating & Active Lifestyles for Diabetes, HEAL-D) has been  
47 co-developed. Initially a face-to-face programme, HEAL-D pivoted to virtual delivery in  
48 response to the COVID-19 pandemic.

1  
2  
3 49 The purpose of this study is to explore (1) the feasibility and acceptability of a virtual model  
4  
5 50 of delivery for HEAL-D in south London and (2) the factors affecting its scale-up across other  
6  
7 51 areas in England.  
8  
9

## 10 52 **Methods and analysis**

11  
12 53 The study will have two strands: (1) a mixed methods prospective evaluation of the virtual  
13  
14 54 delivery of HEAL-D in south London using routinely collected service-level data, service  
15  
16 55 delivery staff and service user interviews, and observations; (2) a prospective qualitative  
17  
18 56 study of the scale-up of this virtual delivery comprising of interviews and focus groups with  
19  
20 57 members of the public, and commissioners and providers of diabetes services across  
21  
22 58 England. Qualitative data will be analysed using thematic analysis. Quantitative analysis will  
23  
24 59 use descriptive statistics and reporting summary tables and figures. The study will be  
25  
26 60 grounded in well-established implementation frameworks and service user involvement.  
27  
28  
29

## 30 61 **Ethics and Dissemination**

31  
32 62 'Minimal Risk Registration' ethical clearance was granted by King's College London's  
33  
34 63 Research Ethics Office (ref: MRA-21/22-28498). Results will be published in a peer-reviewed  
35  
36 64 journal and summaries will be provided to the study funders and participants.  
37  
38

## 39 65 **Registration details**

40  
41 66 N/A  
42  
43  
44

## 45 67 **STRENGTHS AND LIMITATIONS OF THIS STUDY**

- 46  
47  
48 68 • The study design will enable the rapid gathering of insights and identification of  
49  
50 69 practical barriers and enablers to implementation, whilst delivering maximum benefit  
51  
52 70 to service users.  
53  
54 71 • A key strength is the co-design and delivery of the study, which brings together a  
55  
56 72 collaboration between the HIN and ARC South London, in partnership with people  
57  
58 73 from African and Caribbean communities with a lived experience of diabetes.  
59  
60

- 1  
2  
3 74 • A limitation of the approach is the absence of a control group and the use of routinely  
4  
5 75 collected data, which means the study is unable to determine true causation or  
6  
7 76 effectiveness.  
8  
9

## 10 77 **INTRODUCTION**

### 14 78 **National Insights Prioritisation Programme**

16 79 Approximately one year after the emergence of the COVID-19 pandemic in England, the  
17  
18 80 National Health Service (NHS) began considering what could be learned from the ongoing  
19  
20 81 COVID-19 pandemic response such that effective innovations that were necessitated by the  
21  
22 82 pandemic could be sustained within routine services (and, conversely, what innovations may  
23  
24 83 require removal because they were no longer fit for purpose or did not add value). To this  
25  
26 84 effect, in 2021 the NHS Insight Prioritisation Programme (NIPP) was established by the  
27  
28 85 Accelerated Access Collaborative (AAC) and the National Institute for Health and Care  
29  
30 86 Research (NIHR) to accelerate the implementation and evaluation of innovation that  
31  
32 87 supports post-pandemic ways of working, builds service resilience, and delivers benefits and  
33  
34 88 value to patients in England. The objectives for NIPP are to (1) facilitate NIHR Applied  
35  
36 89 Research Collaborations' (ARCs; which carry out applied health research to improve patient  
37  
38 90 care) and the Academic Health Science Networks' (AHSNs; which aim to support spread  
39  
40 91 and adoption of promising innovations) contribution to NHS Reset and Recovery plan by  
41  
42 92 producing insights rapidly for promising innovations, (2) identify innovations that will  
43  
44 93 contribute to Integrated Care Systems (ICSs) and regional needs, and (3) build local  
45  
46 94 capacity and expertise for evaluation and implementation.  
47  
48  
49

### 51 95 **Academic Health Science Networks and Applied Research Collaborations**

52  
53 96 AHSNs were established by NHS England to accelerate spread and adoption of innovation  
54  
55 97 in health and care. There are 15 AHSNs across England, each working locally, as well as  
56  
57 98 nationally, as intermediaries to bring together partners from across the health and care  
58  
59  
60

1  
2  
3 99 system to ‘transform lives through healthcare innovation’ at pace and scale.[1] The NIHR  
4  
5 100 funds 15 ARCs to undertake applied health and care research based on local population  
6  
7 101 needs. Each ARC is a partnership between local universities, NHS organisations, local  
8  
9 102 authorities and AHSN (N.B. ARC and AHSN geographical boundaries are coterminous). In  
10  
11 103 south London (UK), the NIHR ARC South London and AHSN (called the Health Innovation  
12  
13 104 Network, or HIN) have a specific focus on implementation – the former leads on  
14  
15 105 implementation science projects, whilst the latter leads on practical implementation support  
16  
17 106 to evidenced innovations. Within the south London context, implementation science is  
18  
19 107 understood as “the scientific study of methods to promote the systematic uptake of research  
20  
21 108 findings and other evidence-based practices into routine practice”, with the ultimate aim to  
22  
23 109 improve the quality and effectiveness of care.[2] The HIN specifically takes an  
24  
25 110 implementation science informed approach to supporting its work on spread and adoption of  
26  
27 111 innovation.[3,4]

28  
29  
30  
31 112 As part of the NIPP, the HIN and the NIHR ARC south London are collaborating on the  
32  
33 113 implementation and evaluation of a culturally tailored self-management and education  
34  
35 114 intervention for UK African and Caribbean communities with type 2 diabetes (T2D), Healthy  
36  
37 115 Eating and Active Lifestyles for Diabetes (HEAL-D) – described in detail in the next section.

### 38 39 40 116 **Diabetes and HEAL-D**

41  
42 117 It is estimated that T2D affects between 3.5 and 5% of the UK population,[5] however, the  
43  
44 118 prevalence in UK African and Caribbean communities is estimated to be up to three times  
45  
46 119 higher than that of white Europeans.[6] This increased prevalence, coupled with evidence of  
47  
48 120 ethnic disparities in outcomes,[7,8] results in these communities being disproportionately  
49  
50 121 affected by T2D.

51  
52  
53  
54 122 To tackle ethnic inequalities in T2D healthcare access, an evidence-based, culturally tailored  
55  
56 123 T2D self-management and education programme for adults of African and Caribbean  
57  
58 124 heritage has been developed. Healthy Eating & Active Lifestyles for Diabetes (HEAL-D) was  
59  
60

1  
2  
3 125 co-developed between 2016 and 2018 in collaboration with people living with T2D and  
4  
5 126 community leaders from African and Caribbean community organisations.[9] The programme  
6  
7 127 encompasses culturally tailored, group-based, face-to-face education, behaviour change,  
8  
9 128 and participatory physical activity, delivered by trained dietitians and lay educators.[10]

11  
12 129 A randomised controlled feasibility trial, conducted in 2018-19 and published in 2021,  
13  
14 130 demonstrated that the HEAL-D programme is highly acceptable for both participants and  
15  
16 131 healthcare providers.[11] Following its initial development as a face-to-face intervention,  
17  
18 132 HEAL-D pivoted to virtual delivery and is now delivered as a series of live sessions over  
19  
20 133 video call (hereafter, HEAL-D online) in response to the COVID-19 pandemic. HEAL-D  
21  
22 134 online has now been commissioned across south London, with referrals managed through a  
23  
24 135 centralised online booking hub, [Diabetes Book & Learn](#), which is designed to improve  
25  
26 136 access to diabetes courses in south London. Individuals can be referred to Diabetes Book &  
27  
28 137 Learn via healthcare professionals or self-referral, and the service enables people to choose  
29  
30 138 a course to suit them, wherever they live or work, using online booking or a phone booking  
31  
32 139 line.

33  
34  
35  
36 140 To date, studies have not explored the online version of HEAL-D. Therefore, to support  
37  
38 141 further commissioning of the service, it is necessary to understand if an online self-  
39  
40 142 management and education programme for T2D is acceptable and accessible to people  
41  
42 143 from African and Caribbean communities. Additionally, studies have not explored the  
43  
44 144 delivery of HEAL-D outside south London and if the service can be implemented at scale.

#### 45 46 47 145 **Study aims**

48  
49 146 Through the NIPP, the HIN and NIHR ARC South London will evaluate the local  
50  
51 147 implementation of HEAL-D online in south London and its scale-up across other regions in  
52  
53 148 England. The primary aims of this study are to evaluate the feasibility and acceptability of the  
54  
55 149 HEAL-D online service across south London and to assess scalability requirements beyond  
56  
57 150 south London. Specifically, the evaluation will explore (i) service user and service delivery  
58  
59  
60



1  
2  
3 151 staff acceptability, (ii) outcomes delivered for service users and service, (iii) factors  
4  
5 152 influencing the implementation of HEAL-D online in south London, and (iv) the scaling of the  
6  
7 153 service from an operational delivery and commissioning perspective.  
8  
9

10 154 The study will have two strands (1) an evaluation of HEAL-D online in south London and (2)  
11  
12 155 a study of the scale-up of HEAL-D online beyond south London.  
13  
14

15 156 The two strands will address the following questions:  
16  
17

18 157 Evaluation of HEAL-D online in south London:  
19

- 20 158 1. Is HEAL-D online acceptable for service users?  
21  
22 159 2. Is HEAL-D online acceptable and feasible for service delivery staff?  
23  
24 160 3. What benefits do service users gain from participating in HEAL-D online?  
25  
26 161 4. Does HEAL-D online improve service outcomes?  
27  
28 162 5. How does a digital model of delivery affect participation?  
29  
30 163 6. What factors affect the feasibility of implementation and delivery of HEAL-D online in  
31  
32 south London?  
33  
34

35 165 Scaling-up of HEAL-D online across England:  
36  
37

- 38 166 1. What factors affect the scale-up of HEAL-D online from an operational delivery and  
39  
40 167 commissioning perspective? Specifically linked to:  
41  
42 168 a. Feasibility to implement and deliver HEAL-D online at pilot sites  
43  
44 169 b. Understanding the potential impact of a digital model of participation  
45  
46

## 47 170 **METHODS AND ANALYSIS**

48  
49

### 50 171 **Study Design**

51  
52  
53 172 This is a mixed methods prospective evaluation of HEAL-D online in south London and a  
54  
55 173 prospective qualitative study on scaling the HEAL-D online service.  
56  
57  
58  
59  
60

1  
2  
3 174 Tables 1 and 2 outline the evaluation framework and metrics. The evaluation framework is  
4  
5 175 based on the established implementation outcome framework proposed by Proctor et al.,[12]  
6  
7 176 in which patient-level outcomes are impacted by service-level outcomes, which in turn are  
8  
9 177 influenced by implementation outcomes (the latter defined as the observable effects of  
10  
11 178 deliberate and purposive actions to implement a new service, such as HEAL-D online).  
12  
13  
14  
15  
16  
17  
18  
19  
20  
21  
22  
23  
24  
25  
26  
27  
28  
29  
30  
31  
32  
33  
34  
35  
36  
37  
38  
39  
40  
41  
42  
43  
44  
45  
46  
47  
48  
49  
50  
51  
52  
53  
54  
55  
56  
57  
58  
59  
60

For peer review only

179 Table 1 Evaluation framework for HEAL-D online service evaluation in south London

| Evaluation question                                                            | Measure(s)/metrics                                                                                                                                               | Data source(s) / collection method(s)                                                  |
|--------------------------------------------------------------------------------|------------------------------------------------------------------------------------------------------------------------------------------------------------------|----------------------------------------------------------------------------------------|
| <b>Service User Outcomes (satisfaction, symptoms, and function)</b>            |                                                                                                                                                                  |                                                                                        |
| Is HEAL-D online acceptable for service users?                                 | Service user perceptions – exploring experience, satisfaction, suitability, and accessibility                                                                    | Service user interviews. Service user questionnaire (post-course) by service provider. |
|                                                                                | Service activity data as a measure of service user engagement with the virtual HEAL-D programme: attendance rates, dropout rates, completion rates and DNA rates | Service provider                                                                       |
| What benefits do service users gain from participating in HEAL-D online?       | Perceived outcomes                                                                                                                                               | Service user interviews. Service user questionnaire (post-course) by service provider  |
|                                                                                | PROM reporting disease status and wellbeing using Problem Areas In Diabetes (PAID-5) questionnaire.                                                              | Service provider                                                                       |
| <b>Service outcomes (e.g. effectiveness, efficiency/costs, safety, equity)</b> |                                                                                                                                                                  |                                                                                        |
| Is HEAL-D online acceptable and feasible for service delivery staff?           | Staff perceptions – exploring general experience, satisfaction, feasibility, issues of inclusion / equity and potential improvements                             | Service delivery staff interviews. Observations of sessions using fidelity checklist.  |

|                                                                                                                                  |                                                                                                         |                                                                                                           |
|----------------------------------------------------------------------------------------------------------------------------------|---------------------------------------------------------------------------------------------------------|-----------------------------------------------------------------------------------------------------------|
| Does HEAL-D online improve service outcomes?                                                                                     | Service activity data: attendance rates, dropout rates, completion rates and DNA rates                  | Service provider                                                                                          |
|                                                                                                                                  | Potential efficiencies - potential changes to time, costs or resources (positive/negative)              | Service delivery staff interviews. Project documentation.                                                 |
| How does a digital model affect participation?                                                                                   | Service user demographic data: age range, gender, ethnicity (African / Caribbean) and comorbidities     | Service provider                                                                                          |
|                                                                                                                                  | Service user and service delivery staff perceptions                                                     | Service delivery staff and service user interviews                                                        |
| <b>Implementation outcomes (e.g. acceptability, adoption, fidelity)</b>                                                          |                                                                                                         |                                                                                                           |
| What factors affect the implementation and scale-up of the service (from an operational delivery and commissioning perspective)? | Defining core elements of the pathway and service model                                                 | Service delivery staff and service user interviews.<br>Project documentation                              |
|                                                                                                                                  | Feasibility to implement and deliver                                                                    | Service delivery staff and service user interviews                                                        |
|                                                                                                                                  | Fidelity of service delivery                                                                            | Service delivery staff and service user interviews.<br>Observations of sessions using fidelity checklist. |
|                                                                                                                                  | Costs (of implementation)                                                                               | Input unit costs – interviews with service user delivery staff and project documentation                  |
|                                                                                                                                  | Feasibility of routinely collecting clinical outcome data for:<br>HbA1c, blood pressure and cholesterol | Service provider                                                                                          |

180

181 Table 2 Evaluation framework for scaling-up HEAL-D online study

| Evaluation question                                                                                         | Measure(s)/metrics                                                          | Data source(s) / collection method(s)                                                                                        |
|-------------------------------------------------------------------------------------------------------------|-----------------------------------------------------------------------------|------------------------------------------------------------------------------------------------------------------------------|
| What factors affect the scale-up of the service from an operational delivery and commissioning perspective? | Feasibility of scaling up service in other locations – using EPIS framework | Stakeholder interviews (commissioners and service providers)<br>Documentation (local pathways, SOPs, project plans)          |
|                                                                                                             | Perceptions of the potential impact of a digital model of participation     | Interviews and focus groups with stakeholders and members of the public from African and Caribbean communities with diabetes |

182

For peer review only

## Patient and public involvement

Co-design has been integral to development of HEAL-D, and the original intervention was designed in collaboration with members of African and Caribbean communities in south London.[10] Patient and public involvement (PPI) will continue to be key throughout the course of this project and a group of people with African and Caribbean heritage will be recruited to support the study. These individuals will be service users who have completed the HEAL-D online programme and lay partners who have offered to support future development of the programme.

These individuals will form a reference group, and a series of workshops will be held with them at key stages – including to inform the development of study materials and to inform the analysis and reporting of the findings.

## Theoretical frameworks

The evaluation is grounded on well-established implementation frameworks. Firstly, we will apply an established model for multi-level outcome assessment for such evaluations.[12] The model includes patient-level, service-level, and implementation outcomes. Secondly, the 'Exploration-Preparation-Implementation-Sustainment' (EPIS) framework will inform the approach to analysis.[13] EPIS is an evidence-based framework providing a temporal lens to explore the different stages of the implementation process, incorporating service and system-level contextual factors that may impact on early phase preparatory work, subsequent implementation and medium to longer-term sustainability.

## Setting

### Evaluation of HEAL-D online in south London

The evaluation will focus on the delivery of HEAL-D online in south London. HEAL-D online has been commissioned for 12-months (starting in February 2022) as a pilot service and will be hosted via Diabetes Book & Learn. The programme will be managed and delivered by Guy's and St Thomas' NHS Foundation Trust (GSTT), London, UK.

## Scaling-up of HEAL-D online

The scale-up study will explore how HEAL-D online could be scaled, implemented and adopted in other regions in England.

### **Participants and recruitment**

#### Evaluation of HEAL-D online in south London

*HEAL-D online service users:* HEAL-D online has been commissioned for approximately 100 service users (i.e. approximately 10-15 courses) as part of routine care via Diabetes Book & Learn. The programme will be delivered by GSTT as the service provider. The evaluation will use data collected as part of routine care provided to HEAL-D online service users, which includes a post-course questionnaire (Appendix 1). The questionnaire will be used to identify participants who are willing to take part in interviews. The study will aim to invite 20 individuals to participate in an in-depth interview, but data collection will be guided by the principle of saturation [14]. The questionnaire and interviews will assess individual experiences of participating in the programme to understand the feasibility and acceptability of HEAL-D online.

*Service delivery staff:* The evaluation will seek perspectives from staff involved in implementing and delivering HEAL-D online in south London. A target of 10 staff (e.g., dietitians, physiotherapists, lay educators, service managers) will be invited to participate in an interview.

Purposive sampling will be used for all qualitative data collection to ensure the evaluation considers a range of perspectives. Recruitment for interviews will continue until the target sample is achieved, which is estimated to allow saturation to be met.

## Scaling-up of HEAL-D online

*Commissioners and providers of diabetes services:* Approximately 15 key individuals from commissioning and provider organisations from other regions in England will be invited to take part in semi-structured interviews.

1  
2  
3 *Members of African and Caribbean communities:* Adult members of the public from African  
4 and Caribbean communities who have a lived experience of type 2 diabetes will be invited to  
5 participate in focus groups and interviews. Community members will be approached via  
6  
7  
8  
9  
10 community organisations with information about the study and an invitation to participate.

11  
12 All participants in the study will be asked to provide informed written consent prior to data  
13  
14  
15  
16 collection.

## 17 **Data collection methods and sources**

### 18 Evaluation of HEAL-D online in south London

19  
20  
21 The study will use (i) service-level data routinely collected by the service provider, (ii) data  
22  
23  
24 from service delivery staff interviews, (iii) data from service user interviews and  
25  
26  
27 questionnaires, (iv) observations of HEAL-D online, and (v) project documentation. Table 1  
28  
29  
30 outlines the data collection methods and data sources in more detail.

31  
32  
33 Data routinely collected by the service provider will be used to meet the study aims (Table  
34  
35  
36  
37  
38  
39  
40  
41  
42  
43  
44  
45  
46  
47  
48  
49  
50  
51  
52  
53  
54  
55  
56  
57  
58  
59  
60  
1). Approximately 100 service users will access the service during the study period. This will  
include data on service user demographic characteristics (age range, gender, ethnicity and  
comorbidities), attendance rates, dropout and did not attend (DNA) rates, completion rates,  
and the Problem Areas In Diabetes (PAID-5) questionnaire.[15] PAID-5 is a patient-reported  
outcome measure to explore disease status and wellbeing for people with diabetes.

Demographic data will be used to understand potential health inequalities / access issues,  
including digital exclusion. The study will not examine clinical outcome data to determine  
effectiveness, as this falls outside the scope. However, it will explore the feasibility of  
routinely collecting clinical outcome data for HbA1c, blood pressure and cholesterol. This is  
to help understand the factors affecting the routine collection of clinical outcome data (e.g.  
quality, completeness, burden) as part of on-going service improvement and the factors  
affecting the implementation and scale-up of the service.



1  
2  
3 A post-course telephone questionnaire is administered by the service provider as part of  
4 routine care (Appendix 1). The questionnaire collects post-course PAID-5 scores along with  
5 service user experience, satisfaction, and perceived benefits of the programme.  
6  
7

8  
9  
10 One-to-one semi-structured interviews with HEAL-D online service users (n=20) will be used  
11 to understand experience, satisfaction, acceptability, and perceived outcomes. Interview  
12 participants will also be asked about the implications of a digital model for this type of  
13 structured education for diabetes. One-to-one semi-structured interviews with service  
14 delivery staff (n=10) will be used to explore acceptability, feasibility, issues of inclusion and  
15 equity, potential improvements, and the factors affecting the implementation and scale-up of  
16 the service.  
17  
18

19  
20 Input unit costs and core elements of the service and pathway will be explored to understand  
21 the factors that affect the implementation and scale-up of the service (from an operational  
22 delivery and commissioning perspective), which will be collected via project documentation  
23 and interviews.  
24  
25

26  
27 Fidelity is the extent to which an intervention is intended and is important in understanding  
28 the relationship between intervention, its implementation, and outcomes.[16] The study will  
29 establish a checklist to assess fidelity to the core components and principles underpinning  
30 HEAL-D online, which will include aspects of the structure and format, ethos, quality of  
31 delivery (e.g. providers are trained to deliver HEAL-D), participant adherence, and staff and  
32 participant perceptions on relevance and acceptability. The checklist will be piloted and  
33 refined, as necessary. To manage the burden of data collection for the study team, staff and  
34 patients, a range of pragmatic methods will be used to assess fidelity against the checklist:  
35  
36

- 37 • Self-reporting by service users and service delivery staff via interviews - participants  
38 will be asked to explore items in the fidelity checklist.
- 39 • Patient adherence numbers (i.e., the number of attendees per session per course) –  
40 using routinely collected data from the training provider.  
41  
42  
43  
44  
45  
46  
47  
48  
49  
50  
51

- Observation of HEAL-D online sessions – using the fidelity, checklist a senior staff member in the service provider team will observe one session per HEAL-D online course (i.e., over 10-15 courses), with the study team choosing the session at random.

### Scaling-up of HEAL-D online

Table 2 outlines the data collection methods and data sources in more detail for the scaling-up of HEAL-D.

One-to-one semi-structured interviews (n=6) and focus groups (n=16, 2 focus groups of 8 people each) with members of the public from African and Caribbean communities with lived experience of diabetes will be used to understand their perspective about the provision of online learning (e.g. accessibility, acceptability, benefits, risks and limitations). These will be used to understand perceptions of the potential acceptability and implications of a digital model of participation in a structured education programme for diabetes. The combination of interviews and focus groups is to ensure perspectives are obtained from people who may be unable to attend a focus group due to personal circumstances (e.g. caring responsibilities, mobility issues).

Additionally, semi-structured interviews (n=15) will be conducted with commissioners and providers of diabetes services in other areas of England, which will be used to understand the feasibility of a scaling up model from an operational delivery and commissioning perspective.

For both aspects of the study (i.e., evaluation of HEAL-D online in south London and scaling up of HEAL-D online), all interviews and focus groups will be conducted via video call, telephone or in person (as appropriate with COVID-19 guidelines, and participant preference). All topic guides will be piloted and refined where necessary. Appendices 2 and 3 outline the key lines of enquiry that will be used to inform the development of the topic guides for the qualitative data collection (interviews and focus groups). These topic guides

1  
2  
3 will be finalised with input from key stakeholders, including public representatives, and will  
4  
5 be piloted as part of the development process.  
6  
7

## 8 **Data analysis and interpretation**

9

10 Data analysis, interpretation and reporting will be informed by a workshop held with the PPI  
11 reference group.  
12  
13

### 14 **Qualitative Data**

15

16  
17  
18 Thematic analysis will be used to analyse qualitative data following the approach outlined by  
19 Braun and Clarke.[17] Interview recordings will be transcribed professionally, identified  
20 information will be removed and transcripts will be coded in NVivo. 10% of the interview data  
21 will be double coded and consensus will be reached through a dialogue. Coded themes will  
22  
23  
24  
25  
26  
27  
28  
29  
30  
31  
32  
33  
34  
35  
36  
37  
38  
39  
40  
41  
42  
43  
44  
45  
46  
47  
48  
49  
50  
51  
52  
53  
54  
55  
56  
57  
58  
59  
60

### **Quantitative Data**

Analysis will use descriptive statistics (mean, standard deviation, range, percentages) and reporting summary tables and figures. Where relevant and feasible, data will be compared between the face-to-face delivery of HEAL-D in the existing feasibility study of the intervention.[11]

## **DISCUSSION**

This study will evaluate the implementation and scale-up of HEAL-D online, as part of the NHS Insight Prioritisation Programme (NIPP), which aims to gather rapid insights to support the NHS' recovery to COVID-19. The study comprises 1) mixed methods evaluation to understand the feasibility and acceptability of a virtually delivered, culturally tailored diabetes self-management programme for African and Caribbean communities (HEAL-D online) in south London and 2) a prospective qualitative study exploring the scaling up of HEAL-D online.

1  
2  
3 The study design has been chosen to rapidly gather insights and to identify practical barriers  
4 and enablers to implementation, whilst delivering maximum benefit to participants and  
5 service users. A key strength of the approach is the co-design and delivery of the study,  
6 which brings together a collaboration between the HIN (which directly supports scaled  
7 implementation of evidenced interventions, such as HEAL-D) and ARC South London (which  
8 studies implementation processes and outcomes), in partnership with people from African  
9 and Caribbean communities with a lived experience of diabetes. The known limitation of the  
10 approach is the absence of a control group and the use of routinely collected data, which  
11 means the study is unable to determine true causation or effectiveness. However, it does  
12 allow the assessment of the implementation and scale-up of HEAL-D online in a real world  
13 setting to inform rapid service improvement and transformation to address an unmet need  
14 for underserved communities.  
15  
16  
17  
18  
19  
20  
21  
22  
23  
24  
25  
26  
27  
28

## 29 **ETHICS AND DISSEMINATION PLAN**

30  
31  
32 Ethical clearance for this study was granted by King's College London's Research Ethics  
33 Office under the 'Minimal Risk Registration' procedure (registration confirmation reference  
34 number MRA-21/22-28498). All participants will provide written informed consent to  
35 participate, including for their interviews to be recorded.  
36  
37  
38  
39  
40

41 Results will be published in an international peer-reviewed journal and summaries will be  
42 provided to the study funders as well as reference group members and study participants.  
43  
44  
45  
46  
47  
48  
49  
50  
51  
52  
53  
54  
55  
56  
57  
58  
59  
60

## LIST OF ABBREVIATIONS

**AHSN:** Academic Health Science Network

**ARC:** Applied Research Collaboration

**COVID-19:** Coronavirus disease

**EPIS:** Exploration, Preparation, Implementation, Sustainment framework

**GSTT:** Guy's and St Thomas' NHS Foundation Trust

**HEAL-D:** Healthy Eating and Active Lifestyles for Diabetes

**HIN:** Health Innovation Network

**NHS:** National Health Service

**NIHR:** National Institute for Health and Care Research

**NIPP:** National Insights Prioritisation Programme

**PAID-5:** Problem Areas In Diabetes

**PPI:** Patient and public involvement

**PROM:** Patient-reported outcome measure

## REFERENCES

- 1 Giles C, Day A. Is there a role for an embedded knowledge specialist in an organisation like an Academic Health Science Network? A retrospect of a one year pilot. *Business Information Review* 2021;**38**:138–43. doi:10.1177/02663821211032861
- 2 Eccles MP, Mittman BS. Welcome to Implementation Science. *Implementation Science* 2006;**1**:1. doi:10.1186/1748-5908-1-1
- 3 Sibley A, Ziemann A, Robens S, *et al.* Review of spread and adoption approaches across the AHSN Network. Wessex AHSN 2021. [https://www.ahsnnetwork.com/app/uploads/2021/05/Spread-and-adoption-review-final.pdf?utm\\_source=AHSNs&utm\\_medium=toolkit&utm\\_campaign=Spread%20and%20adoption%20report](https://www.ahsnnetwork.com/app/uploads/2021/05/Spread-and-adoption-review-final.pdf?utm_source=AHSNs&utm_medium=toolkit&utm_campaign=Spread%20and%20adoption%20report)
- 4 Walker A, Dale C, Curran N, *et al.* Leading the spread and adoption of innovation at scale: an Academic Health Science Network's perspective. *BMJ Leader* 2021;**5**:155. doi:10.1136/leader-2020-000252
- 5 Wilson C, Alam R, Latif S, *et al.* Patient access to healthcare services and optimisation of self-management for ethnic minority populations living with diabetes: a systematic review. *Health & Social Care in the Community* 2012;**20**:1–19. doi:10.1111/j.1365-2524.2011.01017.x
- 6 Becker E, Boreham R, Chaudhury M, *et al.* The health of minority ethnic groups. 2004. <https://lemosandcrane.co.uk/resources/National%20Statistics%20-%20Health%20Survey%20for%20England%202004.pdf> (accessed 21 Feb 2022).
- 7 James GD, Baker P, Badrick E, *et al.* Type 2 diabetes: a cohort study of treatment, ethnic and social group influences on glycated haemoglobin. *BMJ Open* 2012;**2**:e001477. doi:10.1136/bmjopen-2012-001477
- 8 Lanting LC, Joung IMA, Mackenbach JP, *et al.* Ethnic Differences in Mortality, End-Stage Complications, and Quality of Care Among Diabetic Patients: A review. *Diabetes Care* 2005;**28**:2280–8. doi:10.2337/diacare.28.9.2280
- 9 Goff LM, Moore AP, Harding S, *et al.* Development of Healthy Eating and Active Lifestyles for Diabetes, a culturally tailored diabetes self-management education and support programme for Black-British adults: A participatory research approach. *Diabetic Medicine* 2021;**38**:e14594. doi:10.1111/dme.14594
- 10 Goff LM, Moore AP, Rivas C, *et al.* Healthy Eating and Active Lifestyles for Diabetes (HEAL-D): study protocol for the design and feasibility trial, with process evaluation, of a culturally tailored diabetes self-management programme for African-Caribbean communities. *BMJ Open* 2019;**9**:e023733. doi:10.1136/bmjopen-2018-023733
- 11 Goff LM, Rivas C, Moore A, *et al.* Healthy Eating and Active Lifestyles for Diabetes (HEAL-D), a culturally tailored self-management education and support program for type 2 diabetes in black-British adults: a randomized controlled feasibility trial. *BMJ Open Diab Res Care* 2021;**9**:e002438. doi:10.1136/bmjdr-2021-002438
- 12 Proctor E, Silmere H, Raghavan R, *et al.* Outcomes for implementation research: conceptual distinctions, measurement challenges, and research agenda. *Adm Policy Ment Health* 2011;**38**:65–76. doi:10.1007/s10488-010-0319-7

- 1  
2  
3 13 Moullin JC, Dickson KS, Stadnick NA, *et al.* Systematic review of the Exploration,  
4 Preparation, Implementation, Sustainment (EPIS) framework. *Implementation Science*  
5 2019;**14**:1. doi:10.1186/s13012-018-0842-6  
6  
7 14 Guest G, Bunce A, Johnson L. How Many Interviews Are Enough?: An Experiment with  
8 Data Saturation and Variability. *Field Methods* 2006;**18**:59–82.  
9 doi:10.1177/1525822X05279903  
10  
11 15 McGuire BE, Morrison TG, Hermanns N, *et al.* Short-form measures of diabetes-related  
12 emotional distress: the Problem Areas in Diabetes Scale (PAID)-5 and PAID-1.  
13 *Diabetologia* 2009;**53**:66. doi:10.1007/s00125-009-1559-5  
14  
15 16 Carroll C, Patterson M, Wood S, *et al.* A conceptual framework for implementation  
16 fidelity. *Implement Sci* 2007;**2**:40. doi:10.1186/1748-5908-2-40  
17  
18 17 Braun V, Clarke V. Using thematic analysis in psychology. *Qualitative Research in*  
19 *Psychology* 2006;**3**:77–101. doi:10.1191/1478088706qp063oa  
20  
21 18 Aarons GA, Hurlburt M, Horwitz SM. Advancing a conceptual model of evidence-based  
22 practice implementation in public service sectors. *Adm Policy Ment Health* 2011;**38**:4–  
23 23. doi:10.1007/s10488-010-0327-7  
24  
25  
26  
27  
28  
29  
30  
31  
32  
33  
34  
35  
36  
37  
38  
39  
40  
41  
42  
43  
44  
45  
46  
47  
48  
49  
50  
51  
52  
53  
54  
55  
56  
57  
58  
59  
60

## STATEMENTS

### Authors' contributions

LG, AW, ZL, NC and NS conceived of and proposed the study. SL wrote the first draft of the manuscript. All authors contributed edits to the manuscript. The corresponding author attests that all listed authors meet authorship criteria and that no others meeting the criteria have been omitted. The authors read and approved the final manuscript.

### Funding statement

The development of HEAL-D was supported by funding from National Institute for Health and Care Research (NIHR). The study is funded by NHS England (grant number N/A) with a peer review process by National Insights Prioritisation Programme (NIPP) commissioned by the NHS Accelerated Access Collaborative and NIHR.

This study/project is supported by the NIHR Applied Research Collaboration South London (NIHR ARC South London) at King's College Hospital NHS Foundation Trust. The views expressed are those of the author(s) and not necessarily those of the NIHR or the Department of Health and Social Care.

NS is a member of King's Improvement Science, which offers co-funding to the NIHR ARC South London and is funded by King's Health Partners (Guy's and St Thomas' NHS Foundation Trust, King's College Hospital NHS Foundation Trust, King's College London and South London and Maudsley NHS Foundation Trust), and Guy's and St Thomas' Foundation.

### Competing interests statement

NS is the director of the London Safety and Training Solutions Ltd, which offers training in patient safety, implementation solutions and human factors to healthcare organisations. LG is involved in the delivery of the HEAL-D programme that is being evaluated in this research. The other authors have no conflicts of interest to declare.



1  
2  
3 **Acknowledgements**  
4

5 We are grateful to all those involved in the co-design of HEAL-D from Baitul Rahman Masjid  
6  
7 Mosque, Diabetes UK, Muslim Association of Nigeria, Peckham, St John’s Church,  
8  
9 Peckham, The Latter Rain Outpouring Revival Church.  
10  
11  
12  
13  
14  
15  
16  
17  
18  
19  
20  
21  
22  
23  
24  
25  
26  
27  
28  
29  
30  
31  
32  
33  
34  
35  
36  
37  
38  
39  
40  
41  
42  
43  
44  
45  
46  
47  
48  
49  
50  
51  
52  
53  
54  
55  
56  
57  
58  
59  
60

For peer review only

## APPENDICES

### Appendix 1. Post HEAL-D online course questionnaire

| No. | Question                                                                                                                                          | Possible answers                                                                                              |
|-----|---------------------------------------------------------------------------------------------------------------------------------------------------|---------------------------------------------------------------------------------------------------------------|
| 1   | How did you hear about HEAL-D?                                                                                                                    | GP<br>Diabetic nurse<br>Dietician<br>Family / friend<br>Other (please note)                                   |
| 2a  | When you first heard about HEAL-D, what 3 main things did you expect to get out of the course?                                                    |                                                                                                               |
| 2b  | To what extent were these expectations met? Were your expectations exceeded, met, partially met or not met?                                       | Exceeded<br>met<br>partially met<br>not met                                                                   |
| 3   | For the following questions, on a scale of 1-5 where 1 is not a problem and 5 is a serious problem, please can you rate the following statements: |                                                                                                               |
| 3a  | Feeling scared when you think about living with diabetes                                                                                          | 1 Not a problem<br>2 Minor Problem<br>3 Moderate problem<br>4 Somewhat a serious problem<br>5 Serious problem |
| 3b  | Feeling depressed when you think about living with diabetes                                                                                       |                                                                                                               |
| 3c  | Worrying about the future and the possibility of serious complications                                                                            |                                                                                                               |
| 3d  | Feeling that diabetes is taking up too much of your mental & physical energy every day                                                            |                                                                                                               |
| 3e  | Coping with the complication of diabetes                                                                                                          |                                                                                                               |
| 4   | For the following questions, please rate the following statements about HEAL-D on a                                                               |                                                                                                               |

|    |                                                                                                                                                                                    |                                                                                                  |
|----|------------------------------------------------------------------------------------------------------------------------------------------------------------------------------------|--------------------------------------------------------------------------------------------------|
|    | scale of 1 – 5 where 1 is strongly agree and 5 is strongly disagree                                                                                                                |                                                                                                  |
| 4a | HEAL-D has helped me learn to manage my diabetes                                                                                                                                   | 1 Strongly agree<br>2 Agree<br>3 Neither agree nor disagree<br>4 Disagree<br>5 Strongly disagree |
| 4b | I have learnt practical skills that I will apply to my daily life                                                                                                                  |                                                                                                  |
| 4c | I feel motivated to follow the HEAL-D advice                                                                                                                                       |                                                                                                  |
| 4d | HEAL-D has helped me feel supported in living with diabetes                                                                                                                        |                                                                                                  |
| 4e | It has helped me to feel confident in managing my diabetes                                                                                                                         |                                                                                                  |
| 4f | It was helpful to meet other people with diabetes                                                                                                                                  |                                                                                                  |
| 5  | For the next questions, please rate the following aspects of HEAL-D on a scale of excellent, good, average or poor. And can you please let me know why you have given this rating? |                                                                                                  |
| 5a | Initial phone call with HEAL-D team                                                                                                                                                | Excellent<br>Good<br>Average<br>Poor                                                             |
| 5b | HEAL-D starter pack                                                                                                                                                                |                                                                                                  |
| 5c | Exercise classes                                                                                                                                                                   |                                                                                                  |
| 5d | Cooking session                                                                                                                                                                    |                                                                                                  |
| 5e | Delivery by the facilitators                                                                                                                                                       |                                                                                                  |
| 5f | Interaction with the facilitators                                                                                                                                                  |                                                                                                  |
| 5g | Interaction with other people on your cohort                                                                                                                                       |                                                                                                  |
| 6  | Thinking about the video calling facilities,                                                                                                                                       |                                                                                                  |
| 6a | How easy did you find it to use? On a scale of 1—5 where 1 is very easy and 5 is very difficult                                                                                    | 1. Very Easy<br>2. Easy<br>3. Neither easy nor difficult<br>4. Difficult<br>5. Very difficult    |
| 6b | How did you find the instructions for using bluejeans?<br>Excellent, good, average or poor?                                                                                        | Excellent<br>Good                                                                                |

|    |                                                                                                                                                                                                                                                                                                                                                                                                                   |                                                                         |
|----|-------------------------------------------------------------------------------------------------------------------------------------------------------------------------------------------------------------------------------------------------------------------------------------------------------------------------------------------------------------------------------------------------------------------|-------------------------------------------------------------------------|
|    |                                                                                                                                                                                                                                                                                                                                                                                                                   | Average<br>Poor                                                         |
| 7a | Have you lost any weight since you started the course?                                                                                                                                                                                                                                                                                                                                                            |                                                                         |
| 7b | Have you noticed a reduction in your waist measurements?                                                                                                                                                                                                                                                                                                                                                          |                                                                         |
| 8  | If HEAL-D was available face-to-face or remote, which would you prefer?                                                                                                                                                                                                                                                                                                                                           | Face to face<br>Remote<br>No preference                                 |
| 9  | When would be your preferred timing for attending HEAL-D?                                                                                                                                                                                                                                                                                                                                                         | No preference<br>Weekday daytime<br>Weekday evening<br>Saturday morning |
| 10 | Overall - Please tell us what went well                                                                                                                                                                                                                                                                                                                                                                           |                                                                         |
| 11 | Overall - Please tell us if there is anything that you believe would enhance the course                                                                                                                                                                                                                                                                                                                           |                                                                         |
| 12 | Overall - Would you recommend HEAL-D to family/friends                                                                                                                                                                                                                                                                                                                                                            | Yes<br>No                                                               |
| 13 | Do you have any other comments/feedback?                                                                                                                                                                                                                                                                                                                                                                          |                                                                         |
| 14 | We are currently completing an evaluation of the HEAL-D programme, and we are asking people to complete a telephone / video interview in order to find out their experiences. It will be similar to this questionnaire, and will take approx. 30 minutes. You will also be offered £15 for your time.<br><br>If you would be interested in taking part, can you please confirm that you are happy for me to share | Yes<br>No                                                               |

|    |                                                                                                                                                              |           |
|----|--------------------------------------------------------------------------------------------------------------------------------------------------------------|-----------|
|    | your details with the project team?                                                                                                                          |           |
| 15 | HEAL-D is currently only delivered in South London, but we are looking to develop it further. Would you be interested in hearing about HEAL-D in the future? | Yes<br>No |

For peer review only

1  
2  
3 **Appendix 2. Key lines of enquiry to inform the interview guide development for**  
4 **the evaluation of HEAL-D online in south London**  
5  
6  
7

8 Service users  
9

- 10
- 11 • What is your experience of and perceptions about the acceptability of HEAL-D  
12 online?  
13
  - 14 • What implications does a digital model of delivery have on participation?  
15
  - 16 • What impacts (positive and negative) have you gained from participating in HEAL-D  
17 online?  
18
  - 19 • How could the model be improved?  
20  
21  
22

23  
24 Service delivery staff  
25

- 26
- 27 • What is the feasibility and acceptability of HEAL-D online for African and Caribbean  
28 people with diabetes?  
29
  - 30 • What perceived impacts (positive and negative) does the model have for patients, the  
31 service and health system?  
32
  - 33 • What implications does a digital model of delivery have on participation?  
34
  - 35 • What factors affect the implementation and delivery of HEAL-D online in south  
36 London?  
37
  - 38 • How could the model be improved?  
39  
40  
41  
42  
43  
44  
45  
46  
47  
48  
49  
50  
51  
52  
53  
54  
55  
56  
57  
58  
59  
60

### Appendix 3. Key lines of enquiry to inform interview guide development for the scale up HEAL-D study

#### Public members topics guide

- What are your preferences around accessing a self-management course online versus face to face, and why?
- Describe the potential challenges of attending an online course?
- Describe the potential benefits of attending an online course?

#### Commissioners of diabetes services topic guide

- What evidence would be required for you to commission a HEAL-D online course?
- What are the barriers and facilitators to commissioning HEAL-D?

#### Service providers and professionals delivering diabetes topic guide

- What are the potential challenges you may face when implementing and delivering a virtual course?
- What benefits can you see to delivering a virtual course?

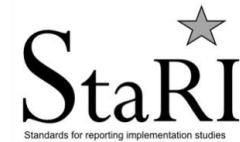

## Standards for Reporting Implementation Studies: the StaRI checklist for completion

The StaRI standard should be referenced as: Pinnock H, Barwick M, Carpenter C, Eldridge S, Grandes G, Griffiths CJ, Rycroft-Malone J, Meissner P, Murray E, Patel A, Sheikh A, Taylor SJC for the StaRI Group. Standards for Reporting Implementation Studies ([StaRI](#)) statement. *BMJ* 2017;356:i6795

The detailed Explanation and Elaboration document, which provides the rationale and exemplar text for all these items is: Pinnock H, Barwick M, Carpenter C, Eldridge S, Grandes G, Griffiths C, Rycroft-Malone J, Meissner P, Murray E, Patel A, Sheikh A, Taylor S, for the StaRI group. Standards for Reporting Implementation Studies ([StaRI](#)). [Explanation and Elaboration document](#). *BMJ Open* 2017;7:e013318

Notes: A key concept of the StaRI standards is the dual strands of describing, on the one hand, the implementation strategy and, on the other, the clinical, healthcare, or public health intervention that is being implemented. These strands are represented as two columns in the checklist.

The primary focus of implementation science is the implementation strategy (column 1) and the expectation is that this will always be completed.

The evidence about the impact of the intervention on the targeted population should always be considered (column 2) and either health outcomes reported or robust evidence cited to support a known beneficial effect of the intervention on the health of individuals or populations.

The StaRI standards refers to the broad range of study designs employed in implementation science. Authors should refer to other reporting standards for advice on reporting specific methodological features. Conversely, whilst all items are worthy of consideration, not all items will be applicable to, or feasible within every study.

| Checklist item            | Reported on page # | Implementation Strategy                                                  | Reported on page # | Intervention                                                                                                                                                                                                                                                                                                                                                             |
|---------------------------|--------------------|--------------------------------------------------------------------------|--------------------|--------------------------------------------------------------------------------------------------------------------------------------------------------------------------------------------------------------------------------------------------------------------------------------------------------------------------------------------------------------------------|
|                           |                    | “Implementation strategy” refers to how the intervention was implemented |                    | “Intervention” refers to the healthcare or public health intervention that is being implemented.                                                                                                                                                                                                                                                                         |
| <b>Title and abstract</b> |                    |                                                                          |                    |                                                                                                                                                                                                                                                                                                                                                                          |
| Title                     | 1                  | 1-2                                                                      |                    | Identification as an implementation study, and description of the methodology in the title and/or keywords                                                                                                                                                                                                                                                               |
| Abstract                  | 2                  | 2-3                                                                      |                    | Identification as an implementation study, including a description of the implementation strategy to be tested, the evidence-based intervention being implemented, and defining the key implementation and health outcomes.                                                                                                                                              |
| <b>Introduction</b>       |                    |                                                                          |                    |                                                                                                                                                                                                                                                                                                                                                                          |
| Introduction              | 3                  | 4-7                                                                      |                    | Description of the problem, challenge or deficiency in healthcare or public health that the intervention being implemented aims to address.                                                                                                                                                                                                                              |
| Rationale*                | 4                  | 8, 12                                                                    | 5-6                | The scientific background and rationale for the implementation strategy (including any underpinning theory/framework/model, how it is expected to achieve its effects and any pilot work).<br>The scientific background and rationale for the intervention being implemented (including evidence about its effectiveness and how it is expected to achieve its effects). |

\*Please note: the StaRI checklist is most appropriate checklist, however as this is a protocol of an evaluation (guided by implementation science and theory) not all items are applicable. Where highlighted (by “\*”), information has been included in the protocol about the checklist item but it does not directly correlate with the StaRI description.



|                      |    |       |                                                                                                                                                                                                  |       |                                                                                                                                                       |
|----------------------|----|-------|--------------------------------------------------------------------------------------------------------------------------------------------------------------------------------------------------|-------|-------------------------------------------------------------------------------------------------------------------------------------------------------|
| Aims and objectives* | 5  | 7     | The aims of the study, differentiating between implementation objectives and any intervention objectives.                                                                                        |       |                                                                                                                                                       |
| Design               | 6  | 8     | The design and key features of the evaluation, (cross referencing to any appropriate methodology reporting standards) and any changes to study protocol, with reasons                            |       |                                                                                                                                                       |
| Context*             | 7  | 12-13 | The context in which the intervention was implemented. (Consider social, economic, policy, healthcare, organisational barriers and facilitators that might influence implementation elsewhere).  |       |                                                                                                                                                       |
| Targeted 'sites'     | 8  | N/A   | The characteristics of the targeted 'site(s)' (e.g locations/personnel/resources etc.) for implementation and any eligibility criteria.                                                          | 13-14 | The population targeted by the intervention and any eligibility criteria.                                                                             |
| Description          | 9  | N/A   | A description of the implementation strategy                                                                                                                                                     | 5-6   | A description of the intervention                                                                                                                     |
| Sub-groups           | 10 | N/A   | Any sub-groups recruited for additional research tasks, and/or nested studies are described                                                                                                      |       |                                                                                                                                                       |
| Outcomes             | 11 | 9-11  | Defined pre-specified primary and other outcome(s) of the implementation strategy, and how they were assessed. Document any pre-determined targets                                               | 9-11  | Defined pre-specified primary and other outcome(s) of the intervention (if assessed), and how they were assessed. Document any pre-determined targets |
| Process evaluation   | 12 | 9-11  | Process evaluation objectives and outcomes related to the mechanism by which the strategy is expected to work                                                                                    |       |                                                                                                                                                       |
| Economic evaluation  | 13 | N/A   | Methods for resource use, costs, economic outcomes and analysis for the implementation strategy                                                                                                  | N/A   | Methods for resource use, costs, economic outcomes and analysis for the intervention                                                                  |
| Sample size          | 14 | 13-16 | Rationale for sample sizes (including sample size calculations, budgetary constraints, practical considerations, data saturation, as appropriate)                                                |       |                                                                                                                                                       |
| Analysis             | 15 | 17    | Methods of analysis (with reasons for that choice)                                                                                                                                               |       |                                                                                                                                                       |
| Sub-group analyses   | 16 | N/A   | Any a priori sub-group analyses (e.g. between different sites in a multicentre study, different clinical or demographic populations), and sub-groups recruited to specific nested research tasks |       |                                                                                                                                                       |

\*Please note: the STaRI checklist is most appropriate checklist, however as this is a protocol of an evaluation (guided by implementation science and theory) not all items are applicable. Where highlighted (by '\*'), information has been included in the protocol about the checklist item but it does not directly correlate with the STaRI description.

| <b>Results</b> (all N/A as this is a protocol) |    |            |                                                                                                                                                                                                                                           |     |                                                                                                                         |
|------------------------------------------------|----|------------|-------------------------------------------------------------------------------------------------------------------------------------------------------------------------------------------------------------------------------------------|-----|-------------------------------------------------------------------------------------------------------------------------|
| Characteristics                                | 17 | N/A        | Proportion recruited and characteristics of the recipient population for the implementation strategy                                                                                                                                      | N/A | Proportion recruited and characteristics (if appropriate) of the recipient population for the intervention              |
| Outcomes                                       | 18 | N/A        | Primary and other outcome(s) of the implementation strategy                                                                                                                                                                               | N/A | Primary and other outcome(s) of the Intervention (if assessed)                                                          |
| Process outcomes                               | 19 | N/A        | Process data related to the implementation strategy mapped to the mechanism by which the strategy is expected to work                                                                                                                     |     |                                                                                                                         |
| Economic evaluation                            | 20 | N/A        | Resource use, costs, economic outcomes and analysis for the implementation strategy                                                                                                                                                       | N/A | Resource use, costs, economic outcomes and analysis for the intervention                                                |
| Sub-group analyses                             | 21 | N/A        | Representativeness and outcomes of subgroups including those recruited to specific research tasks                                                                                                                                         |     |                                                                                                                         |
| Fidelity/adaptation                            | 22 | N/A        | Fidelity to implementation strategy as planned and adaptation to suit context and preferences                                                                                                                                             | N/A | Fidelity to delivering the core components of intervention (where measured)                                             |
| Contextual changes                             | 23 | N/A        | Contextual changes (if any) which may have affected outcomes                                                                                                                                                                              |     |                                                                                                                         |
| Harms                                          | 24 | N/A        | All important harms or unintended effects in each group                                                                                                                                                                                   |     |                                                                                                                         |
| <b>Discussion</b>                              |    |            |                                                                                                                                                                                                                                           |     |                                                                                                                         |
| Structured discussion                          | 25 | 3-4, 17-18 | Summary of findings, strengths and limitations, comparisons with other studies, conclusions and implications                                                                                                                              |     |                                                                                                                         |
| Implications                                   | 26 | N/A        | Discussion of policy, practice and/or research implications of the implementation strategy (specifically including scalability)                                                                                                           | N/A | Discussion of policy, practice and/or research implications of the intervention (specifically including sustainability) |
| <b>General</b>                                 |    |            |                                                                                                                                                                                                                                           |     |                                                                                                                         |
| Statements                                     | 27 | 22-23      | Include statement(s) on regulatory approvals (including, as appropriate, ethical approval, confidential use of routine data, governance approval), trial/study registration (availability of protocol), funding and conflicts of interest |     |                                                                                                                         |

\*Please note: the STaRI checklist is most appropriate checklist, however as this is a protocol of an evaluation (guided by implementation science and theory) not all items are applicable. Where highlighted (by '\*'), information has been included in the protocol about the checklist item but it does not directly correlate with the STaRI description.

# BMJ Open

**A mixed methods implementation study of a virtual culturally tailored diabetes self-management programme for African and Caribbean communities (HEAL-D) in south London and its scaling up across NHS regions in England: study protocol**

|                                 |                                                                                                                                                                                                                                                                                                                                                                                        |
|---------------------------------|----------------------------------------------------------------------------------------------------------------------------------------------------------------------------------------------------------------------------------------------------------------------------------------------------------------------------------------------------------------------------------------|
| Journal:                        | <i>BMJ Open</i>                                                                                                                                                                                                                                                                                                                                                                        |
| Manuscript ID                   | bmjopen-2022-067161.R1                                                                                                                                                                                                                                                                                                                                                                 |
| Article Type:                   | Protocol                                                                                                                                                                                                                                                                                                                                                                               |
| Date Submitted by the Author:   | 11-Oct-2022                                                                                                                                                                                                                                                                                                                                                                            |
| Complete List of Authors:       | Lowry, Sophie; Health Innovation Network<br>Goff, Louise; Kings College London, Diabetes and Nutritional Sciences<br>Irwin, Sally; Health Innovation Network<br>Brady, Oliver; Health Innovation Network<br>Curran, Natasha; Health Innovation Network<br>Lelliott, Zoe; NIHR ARC South London,<br>Sevdalis, Nick; King's College London,<br>Walker, Andrew; Health Innovation Network |
| <b>Primary Subject Heading</b>: | Diabetes and endocrinology                                                                                                                                                                                                                                                                                                                                                             |
| Secondary Subject Heading:      | Health services research                                                                                                                                                                                                                                                                                                                                                               |
| Keywords:                       | DIABETES & ENDOCRINOLOGY, EDUCATION & TRAINING (see Medical Education & Training), QUALITATIVE RESEARCH                                                                                                                                                                                                                                                                                |
|                                 |                                                                                                                                                                                                                                                                                                                                                                                        |

SCHOLARONE™  
Manuscripts

1  
2  
3  
4 1 **A mixed methods implementation study of a**  
5  
6 2 **virtual culturally tailored diabetes self-**  
7  
8 3 **management programme for African and**  
9  
10 4 **Caribbean communities (HEAL-D) in south**  
11  
12 5 **London and its scaling up across NHS regions**  
13  
14 6 **in England: study protocol**  
15  
16  
17  
18  
19

20 8 **Authors**

21  
22 9 Sophie Lowry<sup>1</sup> (0000-0003-1707-9133), Louise Goff<sup>2</sup> (0000-0001-9633-8759), Sally Irwin<sup>1</sup>  
23 10 (0000-0003-4125-2258), Oliver Brady<sup>1</sup> (0000-0002-9097-0486), Natasha Curran<sup>1</sup> (0000-  
24 11 0003-0165-7314), Zoe Lelliott<sup>1</sup> (0000-0002-6596-3057T), Nick Sevdalis<sup>3</sup> (0000-0001-7560-  
25 12 8924), Andrew Walker<sup>1</sup> (0000-0003-1128-8954)  
26  
27  
28

29 14 **Affiliations:**

30  
31  
32 15 <sup>1</sup>Health Innovation Network, London, UK;

33  
34 16 <sup>2</sup>Department of Nutritional Sciences, King's College London, Faculty of Life Sciences and  
35  
36 17 Medicine, London, UK

37  
38  
39 18 <sup>3</sup>Centre for Implementation Science, Institute of Psychiatry, Psychology and Neuroscience,  
40  
41 19 King's College London, London, UK;

42  
43  
44 20 **Corresponding author**

45  
46  
47 21 Full name: Sophie Lowry

48  
49  
50 22 Postal address: Health Innovation Network, Ground Floor, Minerva House, 5 Montague  
51  
52 23 Close, London SE1 9BB

53  
54  
55 24 Email: [sophie.lowry2@nhs.net](mailto:sophie.lowry2@nhs.net)

56  
57 25 Word count: 3283  
58  
59  
60

## 26 KEY WORDS

- 27 1. Diabetes
- 28 2. Education
- 29 3. Self-management
- 30 4. Implementation
- 31 5. Implementation Science
- 32 6. HEAL-D
- 33 7. Virtual
- 34 8. Scale-up

## 36 ABSTRACT

### 37 Introduction

38 The NHS Insight Prioritisation Programme (NIPP) was established to accelerate the  
39 implementation and evaluation of innovation that supports post-pandemic working.

40 Supporting this, the Academic Health Science Network (AHSN) and National Institute for  
41 Health and Care Research (NIHR) Applied Research Collaboration (ARC) in South London  
42 are testing and evaluating the implementation and scale-up of a Type 2 diabetes (T2D)  
43 intervention.

44 T2D is estimated to be three times more prevalent in UK African and Caribbean communities  
45 than in white Europeans. To tackle ethnic inequities in T2D healthcare access, an evidence-  
46 based, culturally tailored self-management and education programme for African and  
47 Caribbean adults (Healthy Eating & Active Lifestyles for Diabetes, HEAL-D) has been co-  
48 developed with people with lived experience. Initially a face-to-face programme, HEAL-D  
49 pivoted to virtual delivery in response to COVID-19.

1  
2  
3 50 The purpose of this study is to explore the (1) feasibility and acceptability of a virtual delivery  
4  
5 51 model for HEAL-D in south London and (2) factors affecting its scale-up across other areas  
6  
7 52 in England.  
8  
9

### 10 53 **Methods and analysis**

11  
12 54 The study will have two strands: (1) mixed methods prospective evaluation of HEAL-D virtual  
13  
14 55 delivery in south London using routinely collected service-level data, service delivery staff  
15  
16 56 and service user interviews, and observations; (2) prospective qualitative study of the scale-  
17  
18 57 up of this virtual delivery comprising of interviews and focus groups with members of the  
19  
20 58 public, and diabetes services commissioners and providers across England. Qualitative data  
21  
22 59 will be analysed using thematic analysis. Quantitative analysis will use descriptive statistics  
23  
24 60 and reporting summary tables and figures. The study will be grounded in well-established  
25  
26 61 implementation frameworks and service user involvement.  
27  
28  
29

### 30 62 **Ethics and Dissemination**

31  
32 63 'Minimal Risk Registration' ethical clearance was granted by King's College London's  
33  
34 64 Research Ethics Office (ref: MRA-21/22-28498). Results will be published in a peer-reviewed  
35  
36 65 journal and summaries provided to the study funders and participants.  
37  
38

### 39 66 **Registration details**

40  
41 67 N/A  
42  
43  
44

## 45 68 **STRENGTHS AND LIMITATIONS OF THIS STUDY**

- 46  
47  
48 69 • The study design will enable the rapid gathering of insights and identification of  
49  
50 70 practical barriers and enablers to implementation, whilst delivering maximum benefit  
51  
52 71 to service users.  
53  
54 72 • A key strength is the co-design and delivery of the study, which brings together a  
55  
56 73 collaboration between the HIN and ARC South London, in partnership with people  
57  
58 74 from African and Caribbean communities with a lived experience of diabetes.  
59  
60

- 1  
2  
3 75 • A limitation of the approach is the absence of a control group and the use of routinely  
4  
5 76 collected data, which means the study is unable to determine true causation or  
6  
7 77 effectiveness.  
8  
9

## 10 78 **INTRODUCTION**

### 11 12 13 14 79 **National Insights Prioritisation Programme**

15  
16 80 Approximately one year after the emergence of the COVID-19 pandemic in England, the  
17  
18 81 National Health Service (NHS) began considering what could be learned from the ongoing  
19  
20 82 COVID-19 pandemic response such that effective innovations that were necessitated by the  
21  
22 83 pandemic could be sustained within routine services (and, conversely, what innovations may  
23  
24 84 require removal because they were no longer fit for purpose or did not add value). To this  
25  
26 85 effect, in 2021 the NHS Insight Prioritisation Programme (NIPP) was established by the  
27  
28 86 Accelerated Access Collaborative (AAC) and the National Institute for Health and Care  
29  
30 87 Research (NIHR) to accelerate the implementation and evaluation of innovation that  
31  
32 88 supports post-pandemic ways of working, builds service resilience, and delivers benefits and  
33  
34 89 value to patients in England. The objectives for NIPP are to (1) facilitate NIHR Applied  
35  
36 90 Research Collaborations' (ARCs; which carry out applied health research to improve patient  
37  
38 91 care) and the Academic Health Science Networks' (AHSNs; which aim to support spread  
39  
40 92 and adoption of promising innovations) contribution to the NHS Reset and Recovery plan by  
41  
42 93 producing insights rapidly for promising innovations, (2) identify innovations that will  
43  
44 94 contribute to Integrated Care Systems (ICSs) and regional needs, and (3) build local  
45  
46 95 capacity and expertise for evaluation and implementation.  
47  
48  
49

### 50 96 **Academic Health Science Networks and Applied Research Collaborations**

51  
52 97 AHSNs were established by NHS England to accelerate spread and adoption of innovation  
53  
54 98 in health and care. There are 15 AHSNs across England, each working locally, as well as  
55  
56 99 nationally, as intermediaries to bring together partners from across the health and care  
57  
58  
59  
60

1  
2  
3 100 system to ‘transform lives through healthcare innovation’ at pace and scale.[1] The NIHR  
4  
5 101 funds 15 ARCs to undertake applied health and care research based on local population  
6  
7 102 needs. Each ARC is a partnership between local universities, NHS organisations, local  
8  
9 103 authorities and AHSN (N.B. ARC and AHSN geographical boundaries are coterminous). In  
10  
11 104 south London (UK), the NIHR ARC South London and AHSN (called the Health Innovation  
12  
13 105 Network, or HIN) have a specific focus on implementation – the former leads on  
14  
15 106 implementation science projects, whilst the latter leads on practical implementation support  
16  
17 107 to evidenced innovations. Within the south London context, implementation science is  
18  
19 108 understood as “the scientific study of methods to promote the systematic uptake of research  
20  
21 109 findings and other evidence-based practices into routine practice”, with the ultimate aim to  
22  
23 110 improve the quality and effectiveness of care.[2] The HIN specifically takes an  
24  
25 111 implementation science informed approach to supporting its work on spread and adoption of  
26  
27 112 innovation.[3,4]

28  
29  
30  
31 113 As part of the NIPP, the HIN and the NIHR ARC south London are collaborating on the  
32  
33 114 implementation and evaluation of a culturally tailored self-management and education  
34  
35 115 intervention for UK African and Caribbean communities with type 2 diabetes (T2D), Healthy  
36  
37 116 Eating and Active Lifestyles for Diabetes (HEAL-D) – described in detail in the next section.

### 40 117 **Diabetes and HEAL-D**

41  
42 118 It is estimated that T2D affects between 3.5 and 5% of the UK population,[5] however, the  
43  
44 119 prevalence in UK African and Caribbean communities is estimated to be up to three times  
45  
46 120 higher than that of white Europeans.[6] This increased prevalence, coupled with evidence of  
47  
48 121 ethnic disparities in outcomes,[7,8] results in these communities being disproportionately  
49  
50 122 affected by T2D.

51  
52  
53  
54 123 To tackle ethnic inequities in T2D healthcare access, an evidence-based, culturally tailored  
55  
56 124 T2D self-management and education programme for adults of African and Caribbean  
57  
58 125 heritage has been developed. Healthy Eating & Active Lifestyles for Diabetes (HEAL-D) was  
59  
60



1  
2  
3 126 co-developed between 2016 and 2018 in collaboration with people living with T2D and  
4  
5 127 community leaders from African and Caribbean community organisations.[9] The programme  
6  
7 128 encompasses culturally tailored, group-based, face-to-face education, behaviour change,  
8  
9 129 and participatory physical activity, delivered by trained dietitians and lay educators.[10]  
10  
11  
12 130 A randomised controlled feasibility trial, conducted in 2018-19 and published in 2021,  
13  
14 131 demonstrated that the HEAL-D programme is highly acceptable for both participants and  
15  
16 132 healthcare providers.[11] Following its initial development as a face-to-face intervention,  
17  
18 133 HEAL-D pivoted to virtual delivery and is now delivered as a series of live sessions over  
19  
20 134 video call (hereafter, HEAL-D online) in response to the COVID-19 pandemic. HEAL-D  
21  
22 135 online has now been commissioned across south London, with referrals managed through a  
23  
24 136 centralised online booking hub, [Diabetes Book & Learn](#), which is designed to improve  
25  
26 137 access to diabetes courses in south London. Individuals can be referred to Diabetes Book &  
27  
28 138 Learn via healthcare professionals or self-referral, and the service enables people to choose  
29  
30 139 a course to suit them, wherever they live or work, using online booking or a phone booking  
31  
32 140 line.

33  
34  
35  
36 141 To date, studies have not explored the online version of HEAL-D. Therefore, to support  
37  
38 142 further commissioning of the service, it is necessary to understand if an online self-  
39  
40 143 management and education programme for T2D is acceptable and accessible to people  
41  
42 144 from African and Caribbean communities. Additionally, studies have not explored the  
43  
44 145 delivery of HEAL-D outside south London and if the service can be implemented at scale.

## 46 47 146 **Study aims**

48  
49 147 Through the NIPP, the HIN and NIHR ARC South London will evaluate the local  
50  
51 148 implementation of HEAL-D online in south London and its scale-up across other regions in  
52  
53 149 England. The primary aims of this study are to evaluate the feasibility and acceptability of the  
54  
55 150 HEAL-D online service across south London and to assess scalability requirements beyond  
56  
57 151 south London. Specifically, the evaluation will explore (i) service user and service delivery  
58  
59  
60

1  
2  
3 152 staff acceptability, (ii) outcomes delivered for service users and service, (iii) factors  
4  
5 153 influencing the implementation of HEAL-D online in south London, and (iv) the scaling of the  
6  
7 154 service from an operational delivery and commissioning perspective.

8  
9  
10 155 The study will have two strands (1) an evaluation of HEAL-D online in south London and (2)  
11  
12 156 a study of the scale-up of HEAL-D online beyond south London.

13  
14  
15 157 The two strands will address the following questions:

16  
17  
18 158 Evaluation of HEAL-D online in south London:

- 19  
20 159 1. Is HEAL-D online acceptable for service users?  
21  
22 160 2. Is HEAL-D online acceptable and feasible for service delivery staff?  
23  
24 161 3. What benefits do service users gain from participating in HEAL-D online?  
25  
26 162 4. Does HEAL-D online improve service outcomes?  
27  
28 163 5. How does a digital model of delivery affect participation?  
29  
30 164 6. What factors affect the feasibility of implementation and delivery of HEAL-D online in  
31  
32 south London?  
33  
34

35 166 Scaling-up of HEAL-D online across England:

- 36  
37  
38 167 1. What factors affect the scale-up of HEAL-D online from an operational delivery and  
39  
40 168 commissioning perspective? Specifically linked to:  
41  
42 169 a. Feasibility to implement and deliver HEAL-D online at pilot sites  
43  
44 170 b. Understanding the potential impact of a digital model of participation  
45  
46

## 47 171 **METHODS AND ANALYSIS**

### 48 49 50 172 **Study Design**

51  
52  
53 173 This is a mixed methods prospective evaluation of HEAL-D online in south London and a  
54  
55 174 prospective qualitative study on scaling the HEAL-D online service.  
56  
57  
58  
59  
60

1  
2  
3 175 Tables 1 and 2 outline the evaluation framework and metrics. The evaluation framework is  
4  
5 176 based on the established implementation outcome framework proposed by Proctor et al.,[12]  
6  
7 177 in which patient-level outcomes are impacted by service-level outcomes, which in turn are  
8  
9 178 influenced by implementation outcomes (the latter defined as the observable effects of  
10  
11 179 deliberate and purposive actions to implement a new service, such as HEAL-D online).  
12  
13  
14  
15  
16  
17  
18  
19  
20  
21  
22  
23  
24  
25  
26  
27  
28  
29  
30  
31  
32  
33  
34  
35  
36  
37  
38  
39  
40  
41  
42  
43  
44  
45  
46  
47  
48  
49  
50  
51  
52  
53  
54  
55  
56  
57  
58  
59  
60

For peer review only

180 Table 1 Evaluation framework for HEAL-D online service evaluation in south London

| Evaluation question                                                            | Measure(s)/metrics                                                                                                                                               | Data source(s) / collection method(s)                                                  |
|--------------------------------------------------------------------------------|------------------------------------------------------------------------------------------------------------------------------------------------------------------|----------------------------------------------------------------------------------------|
| <b>Service User Outcomes (satisfaction, symptoms, and function)</b>            |                                                                                                                                                                  |                                                                                        |
| Is HEAL-D online acceptable for service users?                                 | Service user perceptions – exploring experience, satisfaction, suitability, and accessibility                                                                    | Service user interviews. Service user questionnaire (post-course) by service provider. |
|                                                                                | Service activity data as a measure of service user engagement with the virtual HEAL-D programme: attendance rates, dropout rates, completion rates and DNA rates | Service provider                                                                       |
| What benefits do service users gain from participating in HEAL-D online?       | Perceived outcomes                                                                                                                                               | Service user interviews. Service user questionnaire (post-course) by service provider  |
|                                                                                | PROM reporting disease status and wellbeing using Problem Areas In Diabetes (PAID-5) questionnaire.                                                              | Service provider                                                                       |
| <b>Service outcomes (e.g. effectiveness, efficiency/costs, safety, equity)</b> |                                                                                                                                                                  |                                                                                        |
| Is HEAL-D online acceptable and feasible for service delivery staff?           | Staff perceptions – exploring general experience, satisfaction, feasibility, issues of inclusion / equity and potential improvements                             | Service delivery staff interviews. Observations of sessions using fidelity checklist.  |

|                                                                                                                                  |                                                                                                         |                                                                                                           |
|----------------------------------------------------------------------------------------------------------------------------------|---------------------------------------------------------------------------------------------------------|-----------------------------------------------------------------------------------------------------------|
| Does HEAL-D online improve service outcomes?                                                                                     | Service activity data: attendance rates, dropout rates, completion rates and DNA rates                  | Service provider                                                                                          |
|                                                                                                                                  | Potential efficiencies - potential changes to time, costs or resources (positive/negative)              | Service delivery staff interviews. Project documentation.                                                 |
| How does a digital model affect participation?                                                                                   | Service user demographic data: age range, gender, ethnicity (African / Caribbean) and comorbidities     | Service provider                                                                                          |
|                                                                                                                                  | Service user and service delivery staff perceptions                                                     | Service delivery staff and service user interviews                                                        |
| <b>Implementation outcomes (e.g. acceptability, adoption, fidelity)</b>                                                          |                                                                                                         |                                                                                                           |
| What factors affect the implementation and scale-up of the service (from an operational delivery and commissioning perspective)? | Defining core elements of the pathway and service model                                                 | Service delivery staff and service user interviews.<br>Project documentation                              |
|                                                                                                                                  | Feasibility to implement and deliver                                                                    | Service delivery staff and service user interviews                                                        |
|                                                                                                                                  | Fidelity of service delivery                                                                            | Service delivery staff and service user interviews.<br>Observations of sessions using fidelity checklist. |
|                                                                                                                                  | Costs (of implementation)                                                                               | Input unit costs – interviews with service user delivery staff and project documentation                  |
|                                                                                                                                  | Feasibility of routinely collecting clinical outcome data for:<br>HbA1c, blood pressure and cholesterol | Service provider                                                                                          |

181 Table 2 Evaluation framework for scaling-up HEAL-D online study

| Evaluation question                                                                                         | Measure(s)/metrics                                                          | Data source(s) / collection method(s)                                                                                        |
|-------------------------------------------------------------------------------------------------------------|-----------------------------------------------------------------------------|------------------------------------------------------------------------------------------------------------------------------|
| What factors affect the scale-up of the service from an operational delivery and commissioning perspective? | Feasibility of scaling up service in other locations – using EPIS framework | Stakeholder interviews (commissioners and service providers)<br><br>Documentation (local pathways, SOPs, project plans)      |
|                                                                                                             | Perceptions of the potential impact of a digital model of participation     | Interviews and focus groups with stakeholders and members of the public from African and Caribbean communities with diabetes |

182

For peer review only

## 183 **Patient and public involvement**

184 Co-design has been integral to development of HEAL-D, and the original intervention was  
185 designed in collaboration with members of African and Caribbean communities in south  
186 London.[10] Patient and public involvement (PPI) will continue to be key throughout the  
187 course of this project and a group of people with African and Caribbean heritage will be  
188 recruited to support the study. These individuals will be service users who have completed  
189 the HEAL-D online programme and lay partners who have offered to support future  
190 development of the programme.

191 These individuals will form a reference group, and a series of workshops will be held with  
192 them at key stages – including to inform the development of study materials and to inform  
193 the analysis and reporting of the findings.

## 194 **Theoretical frameworks**

195 The evaluation is grounded on well-established implementation frameworks. Firstly, we will  
196 apply an established model for multi-level outcome assessment for such evaluations.[12]  
197 The model includes patient-level, service-level, and implementation outcomes. Secondly, the  
198 'Exploration-Preparation-Implementation-Sustainment' (EPIS) framework will inform the  
199 approach to analysis.[13] EPIS is an evidence-based framework providing a temporal lens to  
200 explore the different stages of the implementation process, incorporating service and  
201 system-level contextual factors that may impact on early phase preparatory work,  
202 subsequent implementation and medium to longer-term sustainability.

## 203 **Setting**

### 204 Evaluation of HEAL-D online in south London

205 The evaluation will focus on the delivery of HEAL-D online in south London. HEAL-D online  
206 has been commissioned for 12-months (starting in February 2022) as a pilot service and will  
207 be hosted via Diabetes Book & Learn. The programme will be managed and delivered by  
208 Guy's and St Thomas' NHS Foundation Trust (GSTT), London, UK.

1  
2  
3 209 Scaling-up of HEAL-D online  
4

5 210 The scale-up study will explore how HEAL-D online could be scaled, implemented and  
6  
7 211 adopted in other regions in England.  
8  
9

10 212 **Participants and recruitment**  
11

12 213 Unless otherwise stated, participants will not have participated in previous HEAL-D  
13  
14 214 evaluations.  
15  
16

17 215 All sample sizes have been determined based on feasibility considering the total sample  
18  
19 216 available and the principle of saturation that we expect to observe in what participants will  
20  
21 217 report. For the latter, we have used established guidance that suggests that early themes  
22  
23 218 may appear in interview analysis of approximately 6 individuals, and stabilise within 12  
24  
25 219 interviews; taken together, our sampling framework establishes these recommended  
26  
27 220 numbers within a feasible timescale and resource available to carry out the evaluation [14].  
28  
29 221 Additionally, the sample size will be increased accordingly if, once the target sample is  
30  
31 222 achieved, saturation is not met.  
32  
33

34  
35 223 Evaluation of HEAL-D online in south London  
36

37 224 *HEAL-D online service users:* HEAL-D online has been commissioned for approximately 100  
38  
39 225 service users (i.e. approximately 10-15 courses) as part of routine care via Diabetes Book &  
40  
41 226 Learn. The programme will be delivered by GSTT as the service provider. The evaluation will  
42  
43 227 use data collected as part of routine care provided to HEAL-D online service users, which  
44  
45 228 includes a post-course questionnaire (Appendix 1). The questionnaire will be used to identify  
46  
47 229 participants who are willing to take part in interviews. The study will aim to invite 20  
48  
49 230 individuals to participate in an in-depth interview, but data collection will be guided by the  
50  
51 231 principle of saturation [14]. The questionnaire and interviews will assess individual  
52  
53 232 experiences of participating in the programme to understand the feasibility and acceptability  
54  
55 233 of HEAL-D online.  
56  
57  
58  
59  
60



1  
2  
3 234 *Service delivery staff:* The evaluation will seek perspectives from staff involved in  
4  
5 235 implementing and delivering HEAL-D online in south London. A target of 10 staff (e.g.,  
6  
7 236 dieticians, physiotherapists, lay educators, service managers) will be invited to participate in  
8  
9 237 an interview. Some service delivery staff may have taken part in previous HEAL-D  
10  
11 238 evaluations [11].

12  
13  
14 239 Purposive sampling will be used for all qualitative data collection to ensure the evaluation  
15  
16 240 considers a range of perspectives. For service user interviews, this sampling will be guided  
17  
18 241 by considering age, gender and time since diagnosis, whereas for service delivery staff this  
19  
20 242 will consider different professional groups.

### 23 243 **Scaling-up of HEAL-D online**

24  
25 244 *Commissioners and providers of diabetes services:* Approximately 15 key individuals from  
26  
27 245 commissioning and provider organisations from other regions in England will be invited to  
28  
29 246 take part in semi-structured interviews.

30  
31  
32 247 *Members of African and Caribbean communities:* Approximately 22 adult members of the  
33  
34 248 public from African and Caribbean communities who have a lived experience of type 2  
35  
36 249 diabetes will be invited to participate in focus groups and interviews. Community members  
37  
38 250 will be approached via community organisations with information about the study and an  
39  
40 251 invitation to participate.

41  
42  
43 252 All participants in the study will be asked to provide informed written consent prior to data  
44  
45 253 collection.

### 46 254 **Data collection methods and sources**

#### 47 255 **Evaluation of HEAL-D online in south London**

48  
49 256 The study will use (i) service-level data routinely collected by the service provider, (ii) data  
50  
51 257 from service delivery staff interviews, (iii) data from service user interviews and  
52  
53 258 questionnaires, (iv) observations of HEAL-D online, and (v) project documentation. Table 1  
54  
55 259 outlines the data collection methods and data sources in more detail.

1  
2  
3 260 Data routinely collected by the service provider will be used to meet the study aims (Table  
4  
5 261 1). Approximately 100 service users will access the service during the study period. This will  
6  
7 262 include data on service user demographic characteristics (age range, gender, ethnicity and  
8  
9 263 comorbidities), attendance rates, dropout and did not attend (DNA) rates, completion rates,  
10  
11 264 and the Problem Areas In Diabetes (PAID-5) questionnaire.[15] PAID-5 is a patient-reported  
12  
13 265 outcome measure to explore disease status and wellbeing for people with diabetes.

14  
15 266 Demographic data will be used to understand potential health inequities / access issues,  
16  
17 267 including digital exclusion. The study will not examine clinical outcome data to determine  
18  
19 268 effectiveness, as this falls outside the scope. However, it will explore the feasibility of  
20  
21 269 routinely collecting clinical outcome data for HbA1c, blood pressure and cholesterol. This is  
22  
23 270 to help understand the factors affecting the routine collection of clinical outcome data (e.g.  
24  
25 271 quality, completeness, burden) as part of on-going service improvement and the factors  
26  
27 272 affecting the implementation and scale-up of the service.

28  
29  
30  
31 273 A post-course telephone questionnaire is administered by the service provider as part of  
32  
33 274 routine care (Appendix 1). The questionnaire collects post-course PAID-5 scores along with  
34  
35 275 service user experience, satisfaction, and perceived benefits of the programme.

36  
37  
38 276 One-to-one semi-structured interviews with HEAL-D online service users (n=20) will be used  
39  
40 277 to understand experience, satisfaction, acceptability, and perceived outcomes. Interview  
41  
42 278 participants will also be asked about the implications of a digital model for this type of  
43  
44 279 structured education for diabetes. One-to-one semi-structured interviews with service  
45  
46 280 delivery staff (n=10) will be used to explore acceptability, feasibility, issues of inclusion and  
47  
48 281 equity, potential improvements, and the factors affecting the implementation and scale-up of  
49  
50 282 the service.

51  
52  
53 283 Input unit costs and core elements of the service and pathway will be explored to understand  
54  
55 284 the factors that affect the implementation and scale-up of the service (from an operational  
56  
57 285 delivery and commissioning perspective), which will be collected via project documentation  
58  
59 286 and interviews.

1  
2  
3 287 Fidelity is the extent to which an intervention is delivered as intended and is important in  
4  
5 288 understanding the relationship between intervention, its implementation, and outcomes.[16]  
6  
7 289 The study will establish a checklist to assess fidelity to the core components and principles  
8  
9 290 underpinning HEAL-D online, which will include aspects of the structure and format, ethos,  
10  
11 291 quality of delivery (e.g. providers are trained to deliver HEAL-D), participant adherence, and  
12  
13 292 staff and participant perceptions on relevance and acceptability. The checklist will be piloted  
14  
15 293 and refined, as necessary. To manage the burden of data collection for the study team, staff  
16  
17 294 and patients, a range of pragmatic methods will be used to assess fidelity against the  
18  
19 295 checklist:

- 22  
23 296 • Self-reporting by service users and service delivery staff via interviews - participants  
24  
25 297 will be asked to explore items in the fidelity checklist.
- 26  
27 298 • Patient adherence numbers (i.e., the number of attendees per session per course) –  
28  
29 299 using routinely collected data from the training provider.
- 30  
31 300 • Observation of HEAL-D online sessions – using the fidelity checklist, a senior staff  
32  
33 301 member in the service provider team will observe one session per HEAL-D online  
34  
35 302 course (i.e., over 10-15 courses), with the study team choosing the session at  
36  
37 303 random.

#### 40 304 Scaling-up of HEAL-D online

41  
42  
43 305 Table 2 outlines the data collection methods and data sources in more detail for the scaling-  
44  
45 306 up of HEAL-D.

46  
47  
48 307 One-to-one semi-structured interviews (n=6) and focus groups (n=16, 2 focus groups of 8  
49  
50 308 people each) with members of the public from African and Caribbean communities with lived  
51  
52 309 experience of diabetes will be used to understand their perspective about the provision of  
53  
54 310 online learning (e.g. accessibility, acceptability, benefits, risks and limitations). These will be  
55  
56 311 used to understand perceptions of the potential acceptability and implications of a digital  
57  
58 312 model of participation in a structured education programme for diabetes. The combination of  
59  
60

1  
2  
3 313 interviews and focus groups is to ensure perspectives are obtained from people who may be  
4  
5 314 unable to attend a focus group due to personal circumstances (e.g. caring responsibilities,  
6  
7 315 mobility issues).

9  
10 316 Additionally, semi-structured interviews (n=15) will be conducted with commissioners and  
11  
12 317 providers of diabetes services in other areas of England, which will be used to understand  
13  
14 318 the feasibility of a scaling up model from an operational delivery and commissioning  
15  
16 319 perspective.

17  
18  
19 320 For both aspects of the study (i.e., evaluation of HEAL-D online in south London and scaling  
20  
21 321 up of HEAL-D online), all interviews and focus groups will be conducted via video call,  
22  
23 322 telephone or in person (as appropriate with COVID-19 guidelines, and participant  
24  
25 323 preference). All topic guides will be piloted and refined where necessary. Appendices 2 and  
26  
27 324 3 outline the key lines of enquiry that will be used to inform the development of the topic  
28  
29 325 guides for the qualitative data collection (interviews and focus groups). These topic guides  
30  
31 326 will be finalised with input from key stakeholders, including public representatives, and will  
32  
33 327 be piloted as part of the development process.

### 34 35 36 328 **Data analysis and interpretation**

37  
38  
39 329 Data analysis, interpretation and reporting will be informed by a workshop held with the PPI  
40  
41 330 reference group.

### 42 43 44 331 **Qualitative Data**

45  
46  
47 332 Thematic analysis will be used to analyse qualitative data following the approach outlined by  
48  
49 333 Braun and Clarke.[17] Interview recordings will be transcribed professionally, identified  
50  
51 334 information will be removed and transcripts will be coded in NVivo. 10% of the interview data  
52  
53 335 will be double coded and consensus will be reached through a dialogue. Coded themes will  
54  
55 336 be reviewed using the Exploration-Preparation-Implementation-Sustainment (EPIS)  
56  
57 337 framework and discussed among the study team.[18]  
58  
59  
60

### 338 Quantitative Data

339 Analysis will use descriptive statistics (mean, standard deviation, range, percentages) and  
340 reporting summary tables and figures. Where relevant and feasible, data will be compared  
341 between the face-to-face delivery of HEAL-D in the existing feasibility study of the  
342 intervention.[11]

## 343 **DISCUSSION**

344 This study will evaluate the implementation and scale-up of HEAL-D online, as part of the  
345 NHS Insight Prioritisation Programme (NIPP), which aims to gather rapid insights to support  
346 the NHS' recovery to COVID-19. The study comprises 1) mixed methods evaluation to  
347 understand the feasibility and acceptability of a virtually delivered, culturally tailored diabetes  
348 self-management programme for African and Caribbean communities (HEAL-D online) in  
349 south London and 2) a prospective qualitative study exploring the scaling up of HEAL-D  
350 online.

351 The study design has been chosen to rapidly gather insights and to identify practical barriers  
352 and enablers to implementation, whilst delivering maximum benefit to participants and  
353 service users. A key strength of the approach is the co-design and delivery of the study,  
354 which brings together a collaboration between the HIN (which directly supports scaled  
355 implementation of evidenced interventions, such as HEAL-D) and ARC South London (which  
356 studies implementation processes and outcomes), in partnership with people from African  
357 and Caribbean communities with a lived experience of diabetes. The known limitation of the  
358 approach is the absence of a control group and the use of routinely collected data, which  
359 means the study is unable to determine true causation or effectiveness. However, it does  
360 allow the assessment of the implementation and scale-up of HEAL-D online in a real world  
361 setting to inform rapid service improvement and transformation to address an unmet need  
362 for underserved communities.

## 363 **ETHICS AND DISSEMINATION PLAN**

364 Ethical clearance for this study was granted by King's College London's Research Ethics  
365 Office under the 'Minimal Risk Registration' procedure (registration confirmation reference  
366 number MRA-21/22-28498). All participants will provide written informed consent to  
367 participate, including for their interviews to be recorded.

368 Results will be published in an international peer-reviewed journal and summaries will be  
369 provided to the study funders as well as reference group members and study participants.

370

371

372

373

374

375

376

377

378

379

380

381

382

383

384

1  
2  
3  
4 385 **LIST OF ABBREVIATIONS**

5  
6 386 **AHSN:** Academic Health Science Network

7  
8  
9 387 **ARC:** Applied Research Collaboration

10  
11 388 **COVID-19:** Coronavirus disease

12  
13  
14 389 **EPIS:** Exploration, Preparation, Implementation, Sustainment framework

15  
16  
17 390 **GSTT:** Guy's and St Thomas' NHS Foundation Trust

18  
19  
20 391 **HEAL-D:** Healthy Eating and Active Lifestyles for Diabetes

21  
22  
23 392 **HIN:** Health Innovation Network

24  
25  
26 393 **NHS:** National Health Service

27  
28  
29 394 **NIHR:** National Institute for Health and Care Research

30  
31 395 **NIPP:** National Insights Prioritisation Programme

32  
33  
34 396 **PAID-5:** Problem Areas In Diabetes

35  
36  
37 397 **PPI:** Patient and public involvement

38  
39 398 **PROM:** Patient-reported outcome measure

40  
41  
42 399

43  
44  
45 400

46  
47  
48 401

49  
50  
51 402

52  
53  
54 403

55  
56  
57 404

58  
59 405

## 406 STATEMENTS

### 407 Authors' contributions

408 LG, AW, ZL, NC and NS conceived of and proposed the study, with SL, SI and OB  
409 contributing to further study development. SL wrote the first draft of the manuscript. All  
410 authors contributed edits to the manuscript. The corresponding author attests that all listed  
411 authors meet authorship criteria and that no others meeting the criteria have been omitted.  
412 The authors read and approved the final manuscript.

### 413 Funding statement

414 The development of HEAL-D was supported by funding from National Institute for Health and  
415 Care Research (NIHR). The study is funded by NHS England (grant number N/A) with a  
416 peer review process by National Insights Prioritisation Programme (NIPP) commissioned by  
417 the NHS Accelerated Access Collaborative and NIHR.

418 This study/project is supported by the NIHR Applied Research Collaboration South London  
419 (NIHR ARC South London) at King's College Hospital NHS Foundation Trust. The views  
420 expressed are those of the author(s) and not necessarily those of the NIHR or the  
421 Department of Health and Social Care.

422 NS is a member of King's Improvement Science, which offers co-funding to the NIHR ARC  
423 South London and is funded by King's Health Partners (Guy's and St Thomas' NHS  
424 Foundation Trust, King's College Hospital NHS Foundation Trust, King's College London  
425 and South London and Maudsley NHS Foundation Trust), and Guy's and St Thomas'  
426 Foundation.

### 427 Competing interests statement

428 NS is the director of the London Safety and Training Solutions Ltd, which offers training in  
429 patient safety, implementation solutions and human factors to healthcare organisations. LG



1  
2  
3 430 is involved in the delivery of the HEAL-D programme that is being evaluated in this research.  
4

5 431 The other authors have no conflicts of interest to declare.  
6  
7

## 8 432 **Acknowledgements** 9

10 433 We are grateful to all those involved in the co-design of HEAL-D from Baitul Rahman Masjid  
11

12 434 Mosque, Diabetes UK, Muslim Association of Nigeria, Peckham, St John's Church,  
13

14 435 Peckham, The Latter Rain Outpouring Revival Church.  
15  
16

17 436  
18

19  
20 437  
21

22  
23 438  
24

25  
26 439  
27

28 440  
29

30  
31 441  
32

33  
34 442  
35

36  
37 443  
38

39 444  
40

41  
42 445  
43

44  
45 446  
46

47  
48 447  
49

50  
51 448  
52

53 449  
54

55  
56 450  
57

58  
59 451  
60

452 **REFERENCES**

- 453 1 Giles C, Day A. Is there a role for an embedded knowledge specialist in an organisation  
454 like an Academic Health Science Network? A retrospect of a one year pilot. *Business*  
455 *Information Review* 2021;**38**:138–43. doi:10.1177/02663821211032861
- 456 2 Eccles MP, Mittman BS. Welcome to Implementation Science. *Implementation Science*  
457 2006;**1**:1. doi:10.1186/1748-5908-1-1
- 458 3 Sibley A, Ziemann A, Robens S, *et al.* Review of spread and adoption approaches  
459 across the AHSN Network. Wessex AHSN 2021.  
460 [https://www.ahsnnetwork.com/app/uploads/2021/05/Spread-and-adoption-review-](https://www.ahsnnetwork.com/app/uploads/2021/05/Spread-and-adoption-review-final.pdf?utm_source=AHSNs&utm_medium=toolkit&utm_campaign=Spread%20and%20adoption%20report)  
461 [final.pdf?utm\\_source=AHSNs&utm\\_medium=toolkit&utm\\_campaign=Spread%20and%20](https://www.ahsnnetwork.com/app/uploads/2021/05/Spread-and-adoption-review-final.pdf?utm_source=AHSNs&utm_medium=toolkit&utm_campaign=Spread%20and%20adoption%20report)  
462 [adoption%20report](https://www.ahsnnetwork.com/app/uploads/2021/05/Spread-and-adoption-review-final.pdf?utm_source=AHSNs&utm_medium=toolkit&utm_campaign=Spread%20and%20adoption%20report)
- 463 4 Walker A, Dale C, Curran N, *et al.* Leading the spread and adoption of innovation at  
464 scale: an Academic Health Science Network's perspective. *BMJ Leader* 2021;**5**:155.  
465 doi:10.1136/leader-2020-000252
- 466 5 Wilson C, Alam R, Latif S, *et al.* Patient access to healthcare services and optimisation  
467 of self-management for ethnic minority populations living with diabetes: a systematic  
468 review. *Health & Social Care in the Community* 2012;**20**:1–19. doi:10.1111/j.1365-  
469 2524.2011.01017.x
- 470 6 Becker E, Boreham R, Chaudhury M, *et al.* The health of minority ethnic groups.  
471 2004.[https://lemosandcrane.co.uk/resources/National%20Statistics%20-](https://lemosandcrane.co.uk/resources/National%20Statistics%20-%20Health%20Survey%20for%20England%202004.pdf)  
472 [%20Health%20Survey%20for%20England%202004.pdf](https://lemosandcrane.co.uk/resources/National%20Statistics%20-%20Health%20Survey%20for%20England%202004.pdf) (accessed 21 Feb 2022).
- 473 7 James GD, Baker P, Badrick E, *et al.* Type 2 diabetes: a cohort study of treatment,  
474 ethnic and social group influences on glycated haemoglobin. *BMJ Open*  
475 2012;**2**:e001477. doi:10.1136/bmjopen-2012-001477
- 476 8 Lanting LC, Joung IMA, Mackenbach JP, *et al.* Ethnic Differences in Mortality, End-  
477 Stage Complications, and Quality of Care Among Diabetic Patients: A review. *Diabetes*  
478 *Care* 2005;**28**:2280–8. doi:10.2337/diacare.28.9.2280
- 479 9 Goff LM, Moore AP, Harding S, *et al.* Development of Healthy Eating and Active  
480 Lifestyles for Diabetes, a culturally tailored diabetes self-management education and  
481 support programme for Black-British adults: A participatory research approach. *Diabetic*  
482 *Medicine* 2021;**38**:e14594. doi:10.1111/dme.14594
- 483 10 Goff LM, Moore AP, Rivas C, *et al.* Healthy Eating and Active Lifestyles for Diabetes  
484 (HEAL-D): study protocol for the design and feasibility trial, with process evaluation, of a  
485 culturally tailored diabetes self-management programme for African-Caribbean  
486 communities. *BMJ Open* 2019;**9**:e023733. doi:10.1136/bmjopen-2018-023733
- 487 11 Goff LM, Rivas C, Moore A, *et al.* Healthy Eating and Active Lifestyles for Diabetes  
488 (HEAL-D), a culturally tailored self-management education and support program for type  
489 2 diabetes in black-British adults: a randomized controlled feasibility trial. *BMJ Open*  
490 *Diab Res Care* 2021;**9**:e002438. doi:10.1136/bmjdr-2021-002438
- 491 12 Proctor E, Silmere H, Raghavan R, *et al.* Outcomes for implementation research:  
492 conceptual distinctions, measurement challenges, and research agenda. *Adm Policy*  
493 *Ment Health* 2011;**38**:65–76. doi:10.1007/s10488-010-0319-7

- 1  
2  
3 494 13 Moullin JC, Dickson KS, Stadnick NA, *et al.* Systematic review of the Exploration,  
4 495 Preparation, Implementation, Sustainment (EPIS) framework. *Implementation Science*  
5 496 2019;**14**:1. doi:10.1186/s13012-018-0842-6  
6  
7 497 14 Guest G, Bunce A, Johnson L. How Many Interviews Are Enough?: An Experiment with  
8 498 Data Saturation and Variability. *Field Methods* 2006;**18**:59–82.  
9 499 doi:10.1177/1525822X05279903  
10  
11 500 15 McGuire BE, Morrison TG, Hermanns N, *et al.* Short-form measures of diabetes-related  
12 501 emotional distress: the Problem Areas in Diabetes Scale (PAID)-5 and PAID-1.  
13 502 *Diabetologia* 2009;**53**:66. doi:10.1007/s00125-009-1559-5  
14  
15 503 16 Carroll C, Patterson M, Wood S, *et al.* A conceptual framework for implementation  
16 504 fidelity. *Implement Sci* 2007;**2**:40. doi:10.1186/1748-5908-2-40  
17  
18 505 17 Braun V, Clarke V. Using thematic analysis in psychology. *Qualitative Research in*  
19 506 *Psychology* 2006;**3**:77–101. doi:10.1191/1478088706qp063oa  
20  
21 507 18 Aarons GA, Hurlburt M, Horwitz SM. Advancing a conceptual model of evidence-based  
22 508 practice implementation in public service sectors. *Adm Policy Ment Health* 2011;**38**:4–  
23 509 23. doi:10.1007/s10488-010-0327-7  
24  
25  
26 510  
27  
28  
29  
30  
31  
32  
33  
34  
35  
36  
37  
38  
39  
40  
41  
42  
43  
44  
45  
46  
47  
48  
49  
50  
51  
52  
53  
54  
55  
56  
57  
58  
59  
60

## APPENDICES

### Appendix 1. Post HEAL-D online course questionnaire

| No. | Question                                                                                                                                          | Possible answers                                                                                              |
|-----|---------------------------------------------------------------------------------------------------------------------------------------------------|---------------------------------------------------------------------------------------------------------------|
| 1   | How did you hear about HEAL-D?                                                                                                                    | GP<br>Diabetic nurse<br>Dietician<br>Family / friend<br>Other (please note)                                   |
| 2a  | When you first heard about HEAL-D, what 3 main things did you expect to get out of the course?                                                    |                                                                                                               |
| 2b  | To what extent were these expectations met? Were your expectations exceeded, met, partially met or not met?                                       | Exceeded<br>met<br>partially met<br>not met                                                                   |
| 3   | For the following questions, on a scale of 1-5 where 1 is not a problem and 5 is a serious problem, please can you rate the following statements: |                                                                                                               |
| 3a  | Feeling scared when you think about living with diabetes                                                                                          | 1 Not a problem<br>2 Minor Problem<br>3 Moderate problem<br>4 Somewhat a serious problem<br>5 Serious problem |
| 3b  | Feeling depressed when you think about living with diabetes                                                                                       |                                                                                                               |
| 3c  | Worrying about the future and the possibility of serious complications                                                                            |                                                                                                               |
| 3d  | Feeling that diabetes is taking up too much of your mental & physical energy every day                                                            |                                                                                                               |
| 3e  | Coping with the complication of diabetes                                                                                                          |                                                                                                               |
| 4   | For the following questions, please rate the following statements about HEAL-D on a                                                               |                                                                                                               |

|    |                                                                                                                                                                                    |                                                                                                  |
|----|------------------------------------------------------------------------------------------------------------------------------------------------------------------------------------|--------------------------------------------------------------------------------------------------|
|    | scale of 1 – 5 where 1 is strongly agree and 5 is strongly disagree                                                                                                                |                                                                                                  |
| 4a | HEAL-D has helped me learn to manage my diabetes                                                                                                                                   | 1 Strongly agree<br>2 Agree<br>3 Neither agree nor disagree<br>4 Disagree<br>5 Strongly disagree |
| 4b | I have learnt practical skills that I will apply to my daily life                                                                                                                  |                                                                                                  |
| 4c | I feel motivated to follow the HEAL-D advice                                                                                                                                       |                                                                                                  |
| 4d | HEAL-D has helped me feel supported in living with diabetes                                                                                                                        |                                                                                                  |
| 4e | It has helped me to feel confident in managing my diabetes                                                                                                                         |                                                                                                  |
| 4f | It was helpful to meet other people with diabetes                                                                                                                                  |                                                                                                  |
| 5  | For the next questions, please rate the following aspects of HEAL-D on a scale of excellent, good, average or poor. And can you please let me know why you have given this rating? |                                                                                                  |
| 5a | Initial phone call with HEAL-D team                                                                                                                                                | Excellent<br>Good<br>Average<br>Poor                                                             |
| 5b | HEAL-D starter pack                                                                                                                                                                |                                                                                                  |
| 5c | Exercise classes                                                                                                                                                                   |                                                                                                  |
| 5d | Cooking session                                                                                                                                                                    |                                                                                                  |
| 5e | Delivery by the facilitators                                                                                                                                                       |                                                                                                  |
| 5f | Interaction with the facilitators                                                                                                                                                  |                                                                                                  |
| 5g | Interaction with other people on your cohort                                                                                                                                       |                                                                                                  |
| 6  | Thinking about the video calling facilities,                                                                                                                                       |                                                                                                  |
| 6a | How easy did you find it to use? On a scale of 1—5 where 1 is very easy and 5 is very difficult                                                                                    | 1. Very Easy<br>2. Easy<br>3. Neither easy nor difficult<br>4. Difficult<br>5. Very difficult    |
| 6b | How did you find the instructions for using bluejeans?<br>Excellent, good, average or poor?                                                                                        | Excellent<br>Good                                                                                |

|    |                                                                                                                                                                                                                                                                                                                                                                                                                   |                                                                         |
|----|-------------------------------------------------------------------------------------------------------------------------------------------------------------------------------------------------------------------------------------------------------------------------------------------------------------------------------------------------------------------------------------------------------------------|-------------------------------------------------------------------------|
|    |                                                                                                                                                                                                                                                                                                                                                                                                                   | Average<br>Poor                                                         |
| 7a | Have you lost any weight since you started the course?                                                                                                                                                                                                                                                                                                                                                            |                                                                         |
| 7b | Have you noticed a reduction in your waist measurements?                                                                                                                                                                                                                                                                                                                                                          |                                                                         |
| 8  | If HEAL-D was available face-to-face or remote, which would you prefer?                                                                                                                                                                                                                                                                                                                                           | Face to face<br>Remote<br>No preference                                 |
| 9  | When would be your preferred timing for attending HEAL-D?                                                                                                                                                                                                                                                                                                                                                         | No preference<br>Weekday daytime<br>Weekday evening<br>Saturday morning |
| 10 | Overall - Please tell us what went well                                                                                                                                                                                                                                                                                                                                                                           |                                                                         |
| 11 | Overall - Please tell us if there is anything that you believe would enhance the course                                                                                                                                                                                                                                                                                                                           |                                                                         |
| 12 | Overall - Would you recommend HEAL-D to family/friends                                                                                                                                                                                                                                                                                                                                                            | Yes<br>No                                                               |
| 13 | Do you have any other comments/feedback?                                                                                                                                                                                                                                                                                                                                                                          |                                                                         |
| 14 | We are currently completing an evaluation of the HEAL-D programme, and we are asking people to complete a telephone / video interview in order to find out their experiences. It will be similar to this questionnaire, and will take approx. 30 minutes. You will also be offered £15 for your time.<br><br>If you would be interested in taking part, can you please confirm that you are happy for me to share | Yes<br>No                                                               |

|    |                                                                                                                                                              |           |
|----|--------------------------------------------------------------------------------------------------------------------------------------------------------------|-----------|
|    | your details with the project team?                                                                                                                          |           |
| 15 | HEAL-D is currently only delivered in South London, but we are looking to develop it further. Would you be interested in hearing about HEAL-D in the future? | Yes<br>No |

For peer review only

## Appendix 2. Key lines of enquiry to inform the interview guide development for the evaluation of HEAL-D online in south London

### Service users

- What is your experience of and perceptions about the acceptability of HEAL-D online?
- What implications does a digital model of delivery have on participation?
- What impacts (positive and negative) have you gained from participating in HEAL-D online?
- How could the model be improved?

### Service delivery staff

- What is the feasibility and acceptability of HEAL-D online for African and Caribbean people with diabetes?
- What perceived impacts (positive and negative) does the model have for patients, the service and health system?
- What implications does a digital model of delivery have on participation?
- What factors affect the implementation and delivery of HEAL-D online in south London?
- How could the model be improved?



### Appendix 3. Key lines of enquiry to inform interview guide development for the scale up HEAL-D study

#### Public members topics guide

- What are your preferences around accessing a self-management course online versus face to face, and why?
- Describe the potential challenges of attending an online course?
- Describe the potential benefits of attending an online course?

#### Commissioners of diabetes services topic guide

- What evidence would be required for you to commission a HEAL-D online course?
- What are the barriers and facilitators to commissioning HEAL-D?

#### Service providers and professionals delivering diabetes topic guide

- What are the potential challenges you may face when implementing and delivering a virtual course?
- What benefits can you see to delivering a virtual course?

### Standards for Reporting Implementation Studies: the StaRI checklist for completion

The StaRI standard should be referenced as: Pinnock H, Barwick M, Carpenter C, Eldridge S, Grandes G, Griffiths CJ, Rycroft-Malone J, Meissner P, Murray E, Patel A, Sheikh A, Taylor SJC for the StaRI Group. Standards for Reporting Implementation Studies ([StaRI statement](#)). *BMJ* 2017;356:i6795

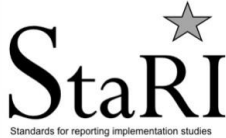

The detailed Explanation and Elaboration document, which provides the rationale and exemplar text for all these items is: Pinnock H, Barwick M, Carpenter C, Eldridge S, Grandes G, Griffiths C, Rycroft-Malone J, Meissner P, Murray E, Patel A, Sheikh A, Taylor S, for the StaRI group. Standards for Reporting Implementation Studies ([StaRI. Explanation and Elaboration document](#)). *BMJ Open* 2017;7:e013318

Notes: A key concept of the StaRI standards is the dual strands of describing, on the one hand, the implementation strategy and, on the other, the clinical, healthcare, or public health intervention that is being implemented. These strands are represented as two columns in the checklist.

The primary focus of implementation science is the implementation strategy (column 1) and the expectation is that this will always be completed. The evidence about the impact of the intervention on the targeted population should always be considered (column 2) and either health outcomes reported or robust evidence cited to support a known beneficial effect of the intervention on the health of individuals or populations.

The StaRI standards refers to the broad range of study designs employed in implementation science. Authors should refer to other reporting standards for advice on reporting specific methodological features. Conversely, whilst all items are worthy of consideration, not all items will be applicable to, or feasible within every study.

| Checklist item            | Reported on page # | Implementation Strategy                                                  | Reported on page # | Intervention                                                                                                                                                                                                                                                                                                                                                          |
|---------------------------|--------------------|--------------------------------------------------------------------------|--------------------|-----------------------------------------------------------------------------------------------------------------------------------------------------------------------------------------------------------------------------------------------------------------------------------------------------------------------------------------------------------------------|
|                           |                    | “Implementation strategy” refers to how the intervention was implemented |                    | “Intervention” refers to the healthcare or public health intervention that is being implemented.                                                                                                                                                                                                                                                                      |
| <b>Title and abstract</b> |                    |                                                                          |                    |                                                                                                                                                                                                                                                                                                                                                                       |
| Title                     | 1                  | 1-2                                                                      |                    | Identification as an implementation study, and description of the methodology in the title and/or keywords                                                                                                                                                                                                                                                            |
| Abstract                  | 2                  | 2-3                                                                      |                    | Identification as an implementation study, including a description of the implementation strategy to be tested, the evidence-based intervention being implemented, and defining the key implementation and health outcomes.                                                                                                                                           |
| <b>Introduction</b>       |                    |                                                                          |                    |                                                                                                                                                                                                                                                                                                                                                                       |
| Introduction              | 3                  | 4-7                                                                      |                    | Description of the problem, challenge or deficiency in healthcare or public health that the intervention being implemented aims to address.                                                                                                                                                                                                                           |
| Rationale*                | 4                  | 8, 12                                                                    | 5-6                | The scientific background and rationale for the implementation strategy (including any underpinning theory/framework/model, how it is expected to achieve its effects and any pilot work). The scientific background and rationale for the intervention being implemented (including evidence about its effectiveness and how it is expected to achieve its effects). |

\*Please note: the StaRI checklist is most appropriate checklist, however as this is a protocol of an evaluation (guided by implementation science and theory) not all items are applicable. Where highlighted (by “\*”), information has been included in the protocol about the checklist item but it does not directly correlate with the StaRI description.

|                      |    |       |                                                                                                                                                                                                  |       |                                                                                                                                                       |
|----------------------|----|-------|--------------------------------------------------------------------------------------------------------------------------------------------------------------------------------------------------|-------|-------------------------------------------------------------------------------------------------------------------------------------------------------|
| Aims and objectives* | 5  | 7     | The aims of the study, differentiating between implementation objectives and any intervention objectives.                                                                                        |       |                                                                                                                                                       |
| Design               | 6  | 8     | The design and key features of the evaluation, (cross referencing to any appropriate methodology reporting standards) and any changes to study protocol, with reasons                            |       |                                                                                                                                                       |
| Context*             | 7  | 12-13 | The context in which the intervention was implemented. (Consider social, economic, policy, healthcare, organisational barriers and facilitators that might influence implementation elsewhere).  |       |                                                                                                                                                       |
| Targeted 'sites'     | 8  | N/A   | The characteristics of the targeted 'site(s)' (e.g locations/personnel/resources etc.) for implementation and any eligibility criteria.                                                          | 13-14 | The population targeted by the intervention and any eligibility criteria.                                                                             |
| Description          | 9  | N/A   | A description of the implementation strategy                                                                                                                                                     | 5-6   | A description of the intervention                                                                                                                     |
| Sub-groups           | 10 | N/A   | Any sub-groups recruited for additional research tasks, and/or nested studies are described                                                                                                      |       |                                                                                                                                                       |
| Outcomes             | 11 | 9-11  | Defined pre-specified primary and other outcome(s) of the implementation strategy, and how they were assessed. Document any pre-determined targets                                               | 9-11  | Defined pre-specified primary and other outcome(s) of the intervention (if assessed), and how they were assessed. Document any pre-determined targets |
| Process evaluation   | 12 | 9-11  | Process evaluation objectives and outcomes related to the mechanism by which the strategy is expected to work                                                                                    |       |                                                                                                                                                       |
| Economic evaluation  | 13 | N/A   | Methods for resource use, costs, economic outcomes and analysis for the implementation strategy                                                                                                  | N/A   | Methods for resource use, costs, economic outcomes and analysis for the intervention                                                                  |
| Sample size          | 14 | 13-16 | Rationale for sample sizes (including sample size calculations, budgetary constraints, practical considerations, data saturation, as appropriate)                                                |       |                                                                                                                                                       |
| Analysis             | 15 | 17    | Methods of analysis (with reasons for that choice)                                                                                                                                               |       |                                                                                                                                                       |
| Sub-group analyses   | 16 | N/A   | Any a priori sub-group analyses (e.g. between different sites in a multicentre study, different clinical or demographic populations), and sub-groups recruited to specific nested research tasks |       |                                                                                                                                                       |

\*Please note: the STaRI checklist is most appropriate checklist, however as this is a protocol of an evaluation (guided by implementation science and theory) not all items are applicable. Where highlighted (by '\*'), information has been included in the protocol about the checklist items but it does not directly correlate with the STaRI description.

| <b>Results (all N/A as this is a protocol)</b> |    |            |                                                                                                                                                                                                                                           |     |                                                                                                                         |
|------------------------------------------------|----|------------|-------------------------------------------------------------------------------------------------------------------------------------------------------------------------------------------------------------------------------------------|-----|-------------------------------------------------------------------------------------------------------------------------|
| Characteristics                                | 17 | N/A        | Proportion recruited and characteristics of the recipient population for the implementation strategy                                                                                                                                      | N/A | Proportion recruited and characteristics (if appropriate) of the recipient population for the intervention              |
| Outcomes                                       | 18 | N/A        | Primary and other outcome(s) of the implementation strategy                                                                                                                                                                               | N/A | Primary and other outcome(s) of the Intervention (if assessed)                                                          |
| Process outcomes                               | 19 | N/A        | Process data related to the implementation strategy mapped to the mechanism by which the strategy is expected to work                                                                                                                     |     |                                                                                                                         |
| Economic evaluation                            | 20 | N/A        | Resource use, costs, economic outcomes and analysis for the implementation strategy                                                                                                                                                       | N/A | Resource use, costs, economic outcomes and analysis for the intervention                                                |
| Sub-group analyses                             | 21 | N/A        | Representativeness and outcomes of subgroups including those recruited to specific research tasks                                                                                                                                         |     |                                                                                                                         |
| Fidelity/adaptation                            | 22 | N/A        | Fidelity to implementation strategy as planned and adaptation to suit context and preferences                                                                                                                                             | N/A | Fidelity to delivering the core components of intervention (where measured)                                             |
| Contextual changes                             | 23 | N/A        | Contextual changes (if any) which may have affected outcomes                                                                                                                                                                              |     |                                                                                                                         |
| Harms                                          | 24 | N/A        | All important harms or unintended effects in each group                                                                                                                                                                                   |     |                                                                                                                         |
| <b>Discussion</b>                              |    |            |                                                                                                                                                                                                                                           |     |                                                                                                                         |
| Structured discussion                          | 25 | 3-4, 17-18 | Summary of findings, strengths and limitations, comparisons with other studies, conclusions and implications                                                                                                                              |     |                                                                                                                         |
| Implications                                   | 26 | N/A        | Discussion of policy, practice and/or research implications of the implementation strategy (specifically including scalability)                                                                                                           | N/A | Discussion of policy, practice and/or research implications of the intervention (specifically including sustainability) |
| <b>General</b>                                 |    |            |                                                                                                                                                                                                                                           |     |                                                                                                                         |
| Statements                                     | 27 | 22-23      | Include statement(s) on regulatory approvals (including, as appropriate, ethical approval, confidential use of routine data, governance approval), trial/study registration (availability of protocol), funding and conflicts of interest |     |                                                                                                                         |

\*Please note: the STaRI checklist is most appropriate checklist, however as this is a protocol of an evaluation (guided by implementation science and theory) not all items are applicable. Where highlighted (by '\*'), information has been included in the protocol about the checklist item but it does not directly correlate with the STaRI description.
