# Supplementary material for: Mixed-methods implementation study of a virtual culturally tailored diabetes self-management programme for African and Caribbean communities (HEAL-D) in south London and its scaling up across NHS regions in England: study protocol
Source: PubMed Central journal article supplement — BMJ Open. 2022 Nov 8;12(11):e067161. doi: 10.1136/bmjopen-2022-067161 (PMC9644082; doi:10.1136/bmjopen-2022-067161), 2022-11-08
Supplement: bmjopen-2022-067161supp001.pdf [file bmjopen-2022-067161supp001.pdf]

## APPENDICES

### Appendix 1. Post HEAL-D online course questionnaire

| No. | Question                                                                                                                                          | Possible answers                                                                                              |
|-----|---------------------------------------------------------------------------------------------------------------------------------------------------|---------------------------------------------------------------------------------------------------------------|
| 1   | How did you hear about HEAL-D?                                                                                                                    | GP<br>Diabetic nurse<br>Dietician<br>Family / friend<br>Other (please note)                                   |
| 2a  | When you first heard about HEAL-D, what 3 main things did you expect to get out of the course?                                                    |                                                                                                               |
| 2b  | To what extent were these expectations met? Were your expectations exceeded, met, partially met or not met?                                       | Exceeded<br>met<br>partially met<br>not met                                                                   |
| 3   | For the following questions, on a scale of 1-5 where 1 is not a problem and 5 is a serious problem, please can you rate the following statements: |                                                                                                               |
| 3a  | Feeling scared when you think about living with diabetes                                                                                          | 1 Not a problem<br>2 Minor Problem<br>3 Moderate problem<br>4 Somewhat a serious problem<br>5 Serious problem |
| 3b  | Feeling depressed when you think about living with diabetes                                                                                       |                                                                                                               |
| 3c  | Worrying about the future and the possibility of serious complications                                                                            |                                                                                                               |
| 3d  | Feeling that diabetes is taking up too much of your mental & physical energy every day                                                            |                                                                                                               |
| 3e  | Coping with the complication of diabetes                                                                                                          |                                                                                                               |
| 4   | For the following questions, please rate the following statements about HEAL-D on a                                                               |                                                                                                               |

|    |                                                                                                                                                                                    |                                                                                                  |
|----|------------------------------------------------------------------------------------------------------------------------------------------------------------------------------------|--------------------------------------------------------------------------------------------------|
|    | scale of 1 – 5 where 1 is strongly agree and 5 is strongly disagree                                                                                                                |                                                                                                  |
| 4a | HEAL-D has helped me learn to manage my diabetes                                                                                                                                   | 1 Strongly agree<br>2 Agree<br>3 Neither agree nor disagree<br>4 Disagree<br>5 Strongly disagree |
| 4b | I have learnt practical skills that I will apply to my daily life                                                                                                                  |                                                                                                  |
| 4c | I feel motivated to follow the HEAL-D advice                                                                                                                                       |                                                                                                  |
| 4d | HEAL-D has helped me feel supported in living with diabetes                                                                                                                        |                                                                                                  |
| 4e | It has helped me to feel confident in managing my diabetes                                                                                                                         |                                                                                                  |
| 4f | It was helpful to meet other people with diabetes                                                                                                                                  |                                                                                                  |
| 5  | For the next questions, please rate the following aspects of HEAL-D on a scale of excellent, good, average or poor. And can you please let me know why you have given this rating? |                                                                                                  |
| 5a | Initial phone call with HEAL-D team                                                                                                                                                | Excellent<br>Good<br>Average<br>Poor                                                             |
| 5b | HEAL-D starter pack                                                                                                                                                                |                                                                                                  |
| 5c | Exercise classes                                                                                                                                                                   |                                                                                                  |
| 5d | Cooking session                                                                                                                                                                    |                                                                                                  |
| 5e | Delivery by the facilitators                                                                                                                                                       |                                                                                                  |
| 5f | Interaction with the facilitators                                                                                                                                                  |                                                                                                  |
| 5g | Interaction with other people on your cohort                                                                                                                                       |                                                                                                  |
| 6  | Thinking about the video calling facilities,                                                                                                                                       |                                                                                                  |
| 6a | How easy did you find it to use? On a scale of 1—5 where 1 is very easy and 5 is very difficult                                                                                    | 1. Very Easy<br>2. Easy<br>3. Neither easy nor difficult<br>4. Difficult<br>5. Very difficult    |
| 6b | How did you find the instructions for using bluejeans?<br>Excellent, good, average or poor?                                                                                        | Excellent<br>Good                                                                                |

|    |                                                                                                                                                                                                                                                                                                                                                                                                                          |                                                                         |
|----|--------------------------------------------------------------------------------------------------------------------------------------------------------------------------------------------------------------------------------------------------------------------------------------------------------------------------------------------------------------------------------------------------------------------------|-------------------------------------------------------------------------|
|    |                                                                                                                                                                                                                                                                                                                                                                                                                          | Average<br>Poor                                                         |
| 7a | Have you lost any weight since you started the course?                                                                                                                                                                                                                                                                                                                                                                   |                                                                         |
| 7b | Have you noticed a reduction in your waist measurements?                                                                                                                                                                                                                                                                                                                                                                 |                                                                         |
| 8  | If HEAL-D was available face-to-face or remote, which would you prefer?                                                                                                                                                                                                                                                                                                                                                  | Face to face<br>Remote<br>No preference                                 |
| 9  | When would be your preferred timing for attending HEAL-D?                                                                                                                                                                                                                                                                                                                                                                | No preference<br>Weekday daytime<br>Weekday evening<br>Saturday morning |
| 10 | Overall - Please tell us what went well                                                                                                                                                                                                                                                                                                                                                                                  |                                                                         |
| 11 | Overall - Please tell us if there is anything that you believe would enhance the course                                                                                                                                                                                                                                                                                                                                  |                                                                         |
| 12 | Overall - Would you recommend HEAL-D to family/friends                                                                                                                                                                                                                                                                                                                                                                   | Yes<br>No                                                               |
| 13 | Do you have any other comments/feedback?                                                                                                                                                                                                                                                                                                                                                                                 |                                                                         |
| 14 | <p>We are currently completing an evaluation of the HEAL-D programme, and we are asking people to complete a telephone / video interview in order to find out their experiences. It will be similar to this questionnaire, and will take approx. 30 minutes. You will also be offered £15 for your time.</p> <p>If you would be interested in taking part, can you please confirm that you are happy for me to share</p> | Yes<br>No                                                               |

|    |                                                                                                                                                              |           |
|----|--------------------------------------------------------------------------------------------------------------------------------------------------------------|-----------|
|    | your details with the project team?                                                                                                                          |           |
| 15 | HEAL-D is currently only delivered in South London, but we are looking to develop it further. Would you be interested in hearing about HEAL-D in the future? | Yes<br>No |

## **Appendix 2. Key lines of enquiry to inform the interview guide development for the evaluation of HEAL-D online in south London**

### Service users

- What is your experience of and perceptions about the acceptability of HEAL-D online?
- What implications does a digital model of delivery have on participation?
- What impacts (positive and negative) have you gained from participating in HEAL-D online?
- How could the model be improved?

### Service delivery staff

- What is the feasibility and acceptability of HEAL-D online for African and Caribbean people with diabetes?
- What perceived impacts (positive and negative) does the model have for patients, the service and health system?
- What implications does a digital model of delivery have on participation?
- What factors affect the implementation and delivery of HEAL-D online in south London?
- How could the model be improved?

### **Appendix 3. Key lines of enquiry to inform interview guide development for the scale up HEAL-D study**

#### Public members topics guide

- What are your preferences around accessing a self-management course online versus face to face, and why?
- Describe the potential challenges of attending an online course?
- Describe the potential benefits of attending an online course?

#### Commissioners of diabetes services topic guide

- What evidence would be required for you to commission a HEAL-D online course?
- What are the barriers and facilitators to commissioning HEAL-D?

#### Service providers and professionals delivering diabetes topic guide

- What are the potential challenges you may face when implementing and delivering a virtual course?
- What benefits can you see to delivering a virtual course?
